1 **Purpose:** Nonalcoholic fatty liver disease (NAFLD), affected more than 70 % of patients  
2 with type 2 diabetes (T2DM), has become a common metabolic liver disease worldwide.  
3 However, the specifically treatments targeting NAFLD have not been found until now.  
4 Pulsed electromagnetic fields have positive effects on multiple diseases. However, the  
5 effects of PEMF on NAFLD in T2DM require further investigation. The present study  
6 assessed the effects of pulsed electromagnetic fields on the liver oxidative stress and lipid  
7 accumulation of db/db mice.

8 **Patients and methods:** Animals were exposed to 2 h of pulsed electromagnetic fields  
9 (15.38 Hz, 2 mT) or sham stimulated, and thereafter sacrificed at 8 weeks later. The  
10 biomarkers of oxidative stress, such as MDA, GSSG and GSH levels, were analysed with  
11 commercial kits. The activity of liver antioxidant enzymes as CAT, SOD and GSH-Px  
12 was detected. Hepatic expressions of CAT, GR, GSH-Px, SOD1, SOD2 and SREBP-1c  
13 at protein levels were determined with Western blotting. Hepatic weight was measured  
14 and triglyceride accumulation were visualized by Oil Red O staining.

15 **Results:** PEMF exposure could protect the liver from oxidative stress injury by  
16 decreasing MDA and GSSG level, promoting reduced GSH level, and increasing GSH-  
17 Px activity and expression in comparison with sham group. But CAT and SOD activity  
18 have no statistic difference as same as CAT, GR, SOD1 and SOD2 expression.  
19 Furthermore, PEMF exposure reduced liver weight and triglyceride content. Meanwhile,  
20 PEMF exposure ameliorated hepatic steatosis through reducing the expression of SREBP-  
21 1c to regulate the lipid synthesis.

22 **Conclusion:** The present study provides evidence that PEMF could increase antioxidant  
23 enzymes activity and alleviate lipid accumulation in fatty liver. This implies that PEMF  
24 exposure has beneficial effects for the treatment of NAFLD in accompany with T2DM.

25 **Keywords:** nonalcoholic fatty liver disease, pulsed electromagnetic fields, oxidative

1 stress, lipid metabolism

## 2 **Introduction**

3 Type 2 diabetes mellitus (T2DM) is the most common form of diabetes with metabolic  
4 disturbance. Recently literatures identified that almost 70% of T2DM patients present  
5 with non-alcoholic fatty liver disease (NAFLD) and the pathophysiology of NAFLD is  
6 still under illumination<sup>1, 2</sup>. A closely connection between NAFLD and T2DM has  
7 increasingly been identified. Notably, a large number of patients with NAFLD is  
8 associated with an increased risk of incident T2DM<sup>3, 4</sup>. But to date, the specific drug  
9 therapy approved for NAFLD have not been found<sup>5, 6</sup>.

10 NAFLD is not caused by alcohol consumption, but associated with hepatic steatosis or  
11 accumulation of lipids, predominantly triglycerides, within hepatocytes. Although the  
12 pathophysiological mechanism with underlying NAFLD has not being elucidated yet,  
13 researches have suggested that oxidative stress is one of the main factors effecting insulin  
14 resistance and the subsequent progression of NAFLD. Excessive generation of reactive  
15 oxygen species (ROS) along with reduced activity of antioxidant enzymatic would  
16 interfere with insulin signalling negatively which cause insulin resistance and increased  
17 triglyceride (TG) accumulation in the liver<sup>7</sup>. Liver is Serving as a hub of lipid metabolism,  
18 has abundant of mitochondria, and thus vulnerable to ROS attack. Generally, liver  
19 functions as a major target of a variety of hormones to regulate glycogenolysis and  
20 gluconeogenesis. Insulin as the only hormone plays an important role with lowering blood  
21 glucose. Therefore, the liver responds to insulin abnormally that would lead to the  
22 regulation of blood glucose out of control. Thus, ameliorating liver oxidative stress is  
23 hypothesized to be one important strategy for treatment of NAFLD patients with T2DM.  
24 Clinical studies have attempted to treat diabetic complications with synthetic antioxidant  
25 therapy. However, the effectiveness of these results were not as expected<sup>8, 9</sup>. In recent

1 years, physical factor therapies improved oxidative stress have been proved<sup>10-13</sup>.  
2 Especially, the pulsed electromagnetic fields (PEMF) as a safe, non-invasive treatment  
3 method is approved by U.S. Food and Drug Administration (FDA)<sup>14</sup>. Some evidences  
4 have found that PEMF as an alternative method are capable to improve oxidative stress.  
5 PEMF stimulation can suppress the production of ROS in human osteoblasts, indicating  
6 alterations in cells antioxidative stress response<sup>12</sup>. Additionally, PEMF exposure reduced  
7 the ROS-level and upregulated the expression of catalase (CAT) and superoxide  
8 dismutase (SOD) in rats, suggesting modulations in oxidative stress accompany with  
9 spinal cord injury<sup>11</sup>.  
10 Thus, this present study aims to investigate whether the PEMF exposure has beneficial  
11 effects on hepatic oxidative stress and lipid accumulation in db/db mice, a model of  
12 T2DM widely utilized to study NAFLD, and to further explore the underlining  
13 mechanisms. The results indicated that PEMF could ameliorate oxidative stress and  
14 alleviate hepatic steatosis in db/db mice.

## 15 **Methods and materials**

### 16 **Materials and Reagents**

17 BCA Protein Assay Kit was purchased from Thermo Scientific. SREBP-1c antibody was  
18 purchased from Santa Cruz Biotechnology. CAT antibody was purchased from  
19 Proteintech Group. Glutathione reductase (GR),  $\beta$ -Actin and glutathione peroxidase  
20 (GSH-Px) antibodies were purchased from Bioworld Technology. SOD1 and SOD2  
21 antibodies were purchased from Abcam Biotechnonogy. The kits used to test the  
22 concentration of hepatic TG, MDA, GSH and GSSG, and the activity of hepatic CAT,  
23 SOD and GSH-Px were purchased from Nanjing Jiancheng Bioengineering Institute.  
24 Other chemicals used in this study were purchased from Sigma.

## 1 **Animals and Experimental Procedures**

2 Animal experiments were approved by Fourth Military Medical University Ethical  
3 committee. Eight 8-week-old female C57BL/KsJ mice ( $17.87\pm 1.33$  g) and 16 8-week-old  
4 female C57BL/KsJ db/db mice ( $29.51\pm 2.37$  g), originally obtained from Jackson  
5 Laboratory, were purchased from Model Animal Research Centre of Nanjing University  
6 where they were bred. The db/db mice were raised in a standard environmental condition  
7 with 12-h light/12-h dark cycle and temperature control ( $22\pm 1$  °C). They were free to  
8 consume standard chow and water.

9 The female C57BL/KsJ mice set as control group (n=8), and the 16 female C57L/6J db/db  
10 mice were randomly divided into two groups including sham group (n=8) and PEMF  
11 group (n=8). All the mice of PEMF group were exposed for 12 weeks and 2 h/day with 2  
12 mT. The control and sham group were placed in an identical chamber with no pulsed  
13 electromagnetic fields. At the end of the experiment, the mice were anesthetized by gas  
14 and hepatic samples were harvested for the assays. Hepatic samples used for  
15 determination of MDA, reduced glutathione (GSH) and oxidized GSH (GSSG), analysis  
16 of antioxidation enzymes activity, western blotting, and TG content determination were  
17 stored at  $-80$  °C until use. Hepatic frozen sections for lipid accumulation analysis were  
18 sliced immediately.

## 19 **Electromagnetic Exposure System**

20 PEMF stimulators in this study were described previously (GHY-III, FMMU, Xi'an,  
21 China; China Patent No. ZL02224739.4)<sup>15-17</sup>. In brief, the waveform consist of a pulse  
22 burst (burst width, 5 ms; pulse wait, 0.02 ms; burst wait, 60 ms; pulse rise, 0.3  $\mu$ s; pulse  
23 fall, 2.0  $\mu$ s) repeated at 15.38 Hz (Fig. 1). Interval distance between two coils (20 cm  
24 diameter) were 10 cm, and turn numbers of enamel-coated round copper wire (1.0 mm  
25 diameter) was 80. To monitor waveform and amplitude of the current in the coils, a high-

1 power resistor of 1  $\Omega$  was placed in series with the coils and voltage drop across the  
2 resistor was observed with an oscilloscope (Agilent Technologies, Santa Clara, CA)  
3 during PEMF exposure period. In this study, the baseline level of magnetic field was 0  
4 mT, and determined peak magnetic field intensity of coils was approximately 2 mT.  
5 Accuracy for peak magnetic field measurement was further confirmed using a  
6 Gaussmeter (Model 455 DSP, Lake Shore Cryotronics, Westerville, OH) with a  
7 transversal Hall Probe (HMFT-3E03-VF). The measured background electromagnetic  
8 field was  $50 \pm 2$   $\mu$ T.

## 9 **Biochemical Assays for Hepatic MDA and GSH Content and Antioxidation** 10 **Enzymes**

11 To measure MDA, GSH and GSSG level as well as the activity of antioxidation enzymes  
12 in livers, commercial kits were used. Briefly, to determine MDA level and activities of  
13 antioxidant enzymes, the liver samples were homogenized in the ice-water bath with 0.9 %  
14 saline at the rate of 100 mg : 0.9 ml. Next, the homogenate was centrifuged at 570 g for  
15 10 min. The supernatant was collected and determined under the instructions. For testing  
16 GSH and GSSG level, the liver samples were homogenized in ice-water bath with agent  
17 given in the kit at the rate of 200 mg : 0.8 ml. Then, the homogenate was centrifuged at  
18 1120 g for 10 min. The supernatant was collected and measured in accordance with the  
19 instructions.

## 20 **Oil Red O Staining**

21 To explore the lipid accumulation in the hepatic cells, frozen liver samples were sliced at  
22 10  $\mu$ m and stained with Oil Red O solution. The frozen slices were placed into the  
23 working solution and stained for 15 min at 22  $^{\circ}$ C. Then, the slices were washed with  
24 37  $^{\circ}$ C distilled water for 15 s. At last, the sections were observed with an Olympus light

1 microscope.

## 2 **Biochemical Assay for Hepatic Triglyceride**

3 To determine the hepatic triglyceride, a commercial kit was taken. In brief, the samples  
4 were homogenized with absolute ethyl alcohol at the rate of 100 mg : 0.9 ml in ice-water  
5 bath. After this, the homogenate was centrifuged at 570 g for 10 min. The supernatant  
6 was collected. After this, the content of triglyceride was analysed in accordance with the  
7 manufacturer's instruction.

## 8 **Western Blot**

9 Western blotting was used to detected the protein expression. The liver tissues were  
10 homogenized with RIPA containing a phosphate inhibitor cocktail for 30 min on ice and  
11 then centrifuged at 20,000 g for 15 min in 4 °C. The supernatant was collected and Protein  
12 concentration was determined with the commercial BCA Protein Assay Kit. Proteins were  
13 denatured by boiling at 95 °C for 5 min with loading buffer. Then 10% sodium dodecyl  
14 sulfate polyacrylamide gel electrophoresis (SDS-PAGE) were used to separate the  
15 denatured proteins. After that, protein extracts were transferred onto polyvinylidene  
16 fluoride (PVDF) membranes. Then, Tris Buffered Saline with Tween (TBST) containing  
17 5% BSA was used to block the nonspecific binding site for 2 h at room temperature and  
18 the PVDF membranes were incubated overnight at 4 °C with primary antibodies. After  
19 incubation, membranes were then washed three times for 10 min each with TBST buffer.  
20 HRP-conjugated goat anti-rabbit secondary antibody (1:3000 diluted in TBST) were then  
21 applied for 1 h at room temperature. The protein bands were visualized by an ECL  
22 chemiluminescence reagents following the guidelines and semi-quantitative analysis was  
23 performed using Quantity One Software.  $\beta$ -Actin was used as an internal control for  
24 normalization.

## 1 **Statistical Analysis**

2 All data were expressed as mean  $\pm$  standard deviation (SD) and one-way ANOVA with  
3 LSD *t* test were used to determine the difference between two groups. Statistical analysis  
4 was performed with Graph Pad Prism 5 and  $p < 0.05$  was considered statistically  
5 significant.

## 6 **Results**

### 7 **PEMF Protected the db/db Mice from Oxidative Stress Injury**

8 To investigate whether PEMF exposure could decrease liver oxidative stress in db/db  
9 mice, the GSH and GSSG level as well as MDA level, and antioxidant enzymes' activity  
10 and expression were detected. As is shown in Fig. 2A-C, PEMF exposure significantly  
11 increased the reduced GSH level and decreased the MDA and GSSG level, comparing  
12 with sham group. Meanwhile, the activity of several antioxidant enzymes was tested  
13 including CAT, SOD and GSH-Px as is shown in Fig. 2D-F. The results indicated that  
14 PEMF exposure promoted the GSH-Px level except CAT and SOD level. In Fig. 2G, the  
15 expressions of CAT, SOD1 and SOD2 proteins were not altered by PEMF. The trend of  
16 glutathione reductase (GR) was higher in comparison with sham group, but the difference  
17 was not statistically significant. Only the overexpression of GSH-Px was observed  
18 significantly.

### 19 **PEMF Alleviated Hepatic Lipid Accumulation by inhibiting SREBP-1c Expression** 20 **in db/db Mice**

21 Fig. 3A shows that the liver weight was significantly decreased in PEMF group. Besides,  
22 PEMF exposure could reduce liver TG content by around 38 % (Fig 3B). Hepatic lipid  
23 accumulation was investigated by Oil Red O staining. As observed in Fig. 3C, both the



1 number and size of lipid droplets were decreased remarkably after given PEMF  
2 stimulation. The expression of SREBP-1c was also attenuated significantly after given  
3 PEMF exposure as shown in Fig. 3D. These indicated that PEMF-treat could improve  
4 liver lipid metabolism.

## 5 **Discussion**

6 NAFLD has become one of the most liver disease worldwide and affects people quality  
7 of life. And the continuously increasing trend of NAFLD with the prevalence and  
8 incidence of T2DM is alarming<sup>18, 19</sup>. To date, the pathogenesis of NAFLD has not been  
9 completely clarified, and there is no accepted treatment available for NAFLD<sup>1, 5</sup>.  
10 Oxidative stress has been recognized as a key mechanism affect the progression of  
11 NAFLD in T2DM, by inducing severe variations in lipid metabolism<sup>20-22</sup>. Therefore,  
12 antioxidant therapeutic approach has become an attractive treatment for diabetic hepatic  
13 complications. Accordingly, the purpose of this present study was to investigate whether  
14 PEMF exposure could alleviate oxidative stress and lipids accumulation in diabetic liver  
15 to improving NAFLD. The main finding of our present study was that PEMF exposure  
16 reduced oxidative stress in association with attenuated hepatic steatosis in db/db mice.  
17 Nowadays, there are evidences suggesting that ROS plays the causal role in liver lipid  
18 droplets formation, while some others with the results that abnormal accumulation of lipid  
19 in liver induced ROS overproduced<sup>23, 24</sup>. Thus, ROS serves as a key driving force to  
20 exacerbates the progression from initial hepatic steatosis to the further NAFLD. It was  
21 already reported that antioxidant molecules were depleted and antioxidant enzymes were  
22 inactivated by ROS<sup>25</sup>. In this study, compared with sham group, the content of MDA in  
23 PEMF group, as an indicator of oxidative stress, was significantly reduced. While GSSG  
24 level was obviously decreased in PEMF group compared with sham group. Meanwhile,

1 GSH level was increased. MDA is a major end-product, thus as an index of lipid  
2 peroxidation. And it cross-links with protein and nucleotides<sup>26</sup>. Up to this, our results  
3 showed that redox homeostasis was improved by given PEMF exposure.

4 To further explore the mechanisms that how the PEMF exposure regulated the oxidative  
5 stress, we investigated the activity and expression of a series of antioxidant enzymes. The  
6 activity/unit and expression of CAT were not changed as the same as SOD. Expression  
7 of GR had increasing trend but was not statistically significant. Both of the activity/unit  
8 and expression of GSH-Px were significantly increased. For its abundance, GSH serves  
9 as a cellular reductant and metabolic controller which is able to scavenge the free radicals  
10 against oxidative damage<sup>27</sup>. In order to achieve the purpose of counteract peroxide, the  
11 GSH-Px would promote the reaction between GSH and H<sub>2</sub>O<sub>2</sub><sup>28</sup>. And it could convert the  
12 GSH (reduced form of glutathione) as a co-substrate into GSSG (oxidized form of  
13 glutathione). GSH-Px as enzymes could scavenge the hydrogen peroxide and lipid  
14 hydroperoxides so as to prevent the peroxides damage<sup>26, 29</sup>. Afterwards, GSSG converts  
15 into GSH catalysed by GR. When the level of GSH decreased, the antioxidant status got  
16 diminished and this would lead to the enhanced lipid peroxidation, even worse, indicate  
17 the apoptotic state of cells<sup>30</sup>. Recent study reported that, including 879 cases of T2DM  
18 and 1295 healthy controls, the GSH-Px activity was decreased obviously, while the  
19 plasma MDA concentration was increased significantly in insulin resistance individuals  
20 in comparison of controls<sup>31</sup>. As newly reported, acupuncture could inhibit oxidative stress  
21 with increasing activity of GSH-Px in abdominal obese NAFLD rats<sup>32</sup>. Presumably,  
22 PEMF exposure could ameliorate hepatic oxidative stress in db/db mice by increasing the  
23 activity/unit and expression of GSH-Px and then enhance the antioxidant ability of  
24 enzymes.

25 Excess accumulation of triglyceride in the hepatocyte is another characteristic of NAFLD.

1 Until now, previous studies already have implied that *de novo* lipogenesis leads  
2 considerably to redundant hepatic lipid storage and steatosis in patients with NAFLD<sup>33</sup>,  
3 <sup>34</sup>. It is traditionally thought that abnormal lipid accumulation induced mitochondrial  
4 dysfunction and the mitochondrial stress generated ROS<sup>34, 35</sup>. To explore the beneficial  
5 effect of PEMF on NAFLD, this study also paid attention to the change of liver which  
6 is the most important organ in body metabolism. After 12-week administration, the liver  
7 weight, TG content determination and frozen sections proved that PEMF exposure could  
8 obviously decreased the hepatic weight through scavenging lipid droplets in hepatocytes  
9 compared with sham group. Some findings suggested that electromagnetic fields  
10 exposure could induce lipid profile changes on brain and is similar to physiological  
11 stress<sup>36</sup>. There are also some results indicated that electromagnetic fields exposure could  
12 induce effects on soil nematodes through alternation of lipid metabolism<sup>37</sup>. The present  
13 study had the similar findings with that electromagnetic fields exposure could induce  
14 effects on lipid metabolism.

15 To investigate the potential key transcription factor, this study focused on sterol  
16 regulatory element binding proteins (SREBPs) that regulate the expression of genes  
17 control synthesis of fatty acid and cholesterol. Previous studies have identified there are  
18 three subtypes in SREBPs: SREBP-1a, SREBP-1c and SREBP2. SREBP-1c is expressed  
19 with specially high level in the fatty livers of obese, insulin resistant and  
20 hyperinsulinaemic animal models<sup>38, 39</sup>. Since PEMF could significantly improve the lipid  
21 accumulation in db/db mice, this study investigated the protein expression level of  
22 SREBP-1c. And the result showed that PEMF exposure attenuated the expression of  
23 SREBP-1c by about 30%. Huang et al reported that Meretrix meretrix oligopeptides  
24 downregulated SREBP-1c expression to ameliorate high-fat-diet-induced NAFLD<sup>40</sup>.  
25 Xyloketal B had an effect of lowering hepatic lipid accumulation via targeting the

1 activation of SREBP-1c on NAFLD<sup>20</sup>. Hepatic lipid accumulation also could be  
2 attenuated by Crude triterpenoid saponins from *Ilex latifolia* via inhibiting SREBP-1c  
3 expression on NAFLD<sup>41</sup>. Therefore, the present study indicated that PEMF exposure  
4 could reduce abnormal liver lipid accumulation via downregulating the SREBP-1c  
5 expression in db/db mice.

## 6 **Conclusion**

7 In conclusion, PEMF exposure could protect liver from oxidative injury by increasing  
8 antioxidant enzyme activity and eliminate lipid accumulation by declining the SREBP-  
9 1c expression. Although the exact pathological process of NAFLD has been unclear and  
10 there is no specific therapeutic strategies with NAFLD, the present study probably  
11 provides a new solutions for NAFLD prevention and treatment.

## 12 **Acknowledgements**

13 This work was supported by the Natural Science Foundation of Shaanxi Province  
14 (2018SF176) and National Nature Scientific Foundation (NSFC81471806 and  
15 NSFC51577188).

## 16 **Disclosure**

17 There are no conflicts of interest to declare.

1

2

## References:

- 3 1. Younossi ZM, Loomba R, Rinella ME, Bugianesi E, Marchesini G , Neuschwander-  
4 Tetri BA et al. Current and future therapeutic regimens for nonalcoholic fatty liver  
5 disease and nonalcoholic steatohepatitis. HEPATOLOGY 2018;68:361-71.
- 6 2. Sumida Y, Seko Y , Yoneda M. Novel antidiabetic medications for non-alcoholic fatty  
7 liver disease with type 2 diabetes mellitus. HEPATOL RES 2017;47:266-80.
- 8 3. Valenti L, Bugianesi E, Pajvani U , Targher G. Nonalcoholic fatty liver disease: cause  
9 or consequence of type 2 diabetes? LIVER INT 2016;36:1563-79.
- 10 4. Yang P, Liang Y, Luo Y, Li Z, Wen Y , Shen J et al. Liraglutide ameliorates  
11 nonalcoholic fatty liver disease in diabetic mice via the IRS2/PI3K/Akt signaling  
12 pathway. Diabetes, Metabolic Syndrome and Obesity: Targets and Therapy  
13 2019;Volume 12:1013-21.
- 14 5. Stefan N, Häring H , Cusi K. Non-alcoholic fatty liver disease: causes, diagnosis,  
15 cardiometabolic consequences, and treatment strategies. The Lancet Diabetes &  
16 Endocrinology 2018.
- 17 6. Sarwar R, Pierce N , Koppe S. Obesity and nonalcoholic fatty liver disease: current  
18 perspectives. Diabetes, Metabolic Syndrome and Obesity: Targets and Therapy  
19 2018;Volume 11:533-42.
- 20 7. Cichoż-Lach H. Oxidative stress as a crucial factor in liver diseases. WORLD J  
21 GASTROENTERO 2014;20:8082.
- 22 8. Al-Waili N, Al-Waili H, Al-Waili T , Salom K. Natural antioxidants in the treatment  
23 and prevention of diabetic nephropathy; a potential approach that warrants clinical  
24 trials. REDOX REP 2017;22:99-118.
- 25 9. Oyenihni AB, Ayeleso AO, Mukwevho E , Masola B. Antioxidant Strategies in the

- 1 Management of Diabetic Neuropathy. BIOMED RES INT 2015;2015:1-15.
- 2 10. Liu Y, Zhai M, Guo F, Shi T, Liu J , Wang X et al. Whole Body Vibration Improves  
3 Insulin Resistance in db/db Mice: Amelioration of Lipid Accumulation and Oxidative  
4 Stress. APPL BIOCHEM BIOTECH 2016;179:819-29.
- 5 11. Wang C, Liu Y, Wang Y, Wei Z, Suo D , Ning G et al. Low-frequency pulsed  
6 electromagnetic field promotes functional recovery, reduces inflammation and  
7 oxidative stress, and enhances HSP70 expression following spinal cord injury. MOL  
8 MED REP 2019;19:1687-93.
- 9 12. Ehnert S, Fentz A, Schreiner A, Birk J, Wilbrand B , Ziegler P et al. Extremely low  
10 frequency pulsed electromagnetic fields cause antioxidative defense mechanisms in  
11 human osteoblasts via induction of O<sub>2</sub> and H<sub>2</sub>O<sub>2</sub>. SCI REP-UK 2017;7.
- 12 13. Karmacharya MB, Hada B, Park SR , Choi BH. Low-Intensity Ultrasound Decreases  
13  $\alpha$ -Synuclein Aggregation via Attenuation of Mitochondrial Reactive Oxygen Species  
14 in MPP(+)-Treated PC12 Cells. MOL NEUROBIOL 2017;54:6235-44.
- 15 14. C. Andrew L. Bassett, Mitchell SN , Sawnie R. Gaston. Pulsing electromagnetic field  
16 treatment in ununited fractures and failed arthrodeses. JAMA 1982;247:623-8.
- 17 15. Zhai M, Jing D, Tong S, Wu Y, Wang P , Zeng Z et al. Pulsed electromagnetic fields  
18 promote in vitro osteoblastogenesis through a Wnt/ $\beta$ -catenin signaling-associated  
19 mechanism. BIOELECTROMAGNETICS 2016;37:152-62.
- 20 16. Jing D, Zhai M, Tong S, Xu F, Cai J , Shen G et al. Pulsed electromagnetic fields  
21 promote osteogenesis and osseointegration of porous titanium implants in bone defect  
22 repair through a Wnt/ $\beta$ -catenin signaling-associated mechanism. SCI REP-UK  
23 2016;6.
- 24 17. Wang P, Tang C, Wu J, Yang Y, Yan Z , Liu X et al. Pulsed electromagnetic fields  
25 regulate osteocyte apoptosis, RANKL/OPG expression, and its control of

- 1 osteoclastogenesis depending on the presence of primary cilia. J CELL PHYSIOL  
2 2018.
- 3 18. Estes C, Razavi H, Loomba R, Younossi Z , Sanyal AJ. Modeling the epidemic of  
4 nonalcoholic fatty liver disease demonstrates an exponential increase in burden of  
5 disease. HEPATOLOGY 2018;67:123-33.
- 6 19. Su M, He Y, Li Q , Zhu B. Efficacy of Acetylshikonin in Preventing Obesity and  
7 Hepatic Steatosis in db/db Mice. MOLECULES 2016;21:976.
- 8 20. Zhang Y, Meng T, Zuo L, Bei Y, Zhang Q , Su Z et al. Xyloketal B Attenuates Fatty  
9 Acid-Induced Lipid Accumulation via the SREBP-1c Pathway in NAFLD Models.  
10 MAR DRUGS 2017;15:163.
- 11 21. Rotman Y , Sanyal AJ. Current and upcoming pharmacotherapy for non-alcoholic  
12 fatty liver disease. GUT 2016;66:180-90.
- 13 22. Gentric G, Maillet V, Paradis V, Couton D, L Hermitte A , Panasyuk G et al. Oxidative  
14 stress promotes pathologic polyploidization in nonalcoholic fatty liver disease. J  
15 CLIN INVEST 2015;125:981-92.
- 16 23. Tsedensodnom O , Sadler KC. ROS: Redux and paradox in fatty liver disease.  
17 HEPATOLOGY 2013;58:1210-2.
- 18 24. Subhapradha N, Saravanan R, Ramasamy P, Srinivasan A, Shanmugam V ,  
19 Shanmugam A. Hepatoprotective Effect of  $\beta$ -Chitosan from *Gladius* of *Sepioteuthis*  
20 *lessoniana* Against Carbon Tetrachloride-Induced Oxidative Stress in Wistar Rats.  
21 APPL BIOCHEM BIOTECH 2014;172:9-20.
- 22 25. Wensheng L, Baker SS, Baker RD , Lixin Z. Antioxidant Mechanisms in  
23 Nonalcoholic Fatty Liver Disease. CURR DRUG TARGETS 2015;16:1301.
- 24 26. Kumar AK , K V. Protective Effect of *Punica granatum* Peel and *Vitis vinifera* Seeds  
25 on DEN-Induced Oxidative Stress and Hepatocellular Damage in Rats. APPL

- 1        BIOCHEM BIOTECH 2015;175:410-20.
- 2    27. Meister A. Glutathione deficiency produced by inhibition of its synthesis, and its  
3        reversal; applications in research and therapy. *Pharmacol Ther* 1991;51:155-94.
- 4    28. Lu Y, Luo Q, Cui H, Deng H, Kuang P , Liu H et al. Sodium fluoride causes oxidative  
5        stress and apoptosis in the mouse liver. *Aging* 2017;9:1623-39.
- 6    29. You BR, Shin HR, Han BR, Kim SH , Park WH. Auranofin induces apoptosis and  
7        necrosis in HeLa cells via oxidative stress and glutathione depletion. *MOL MED REP*  
8        2015;11:1428-34.
- 9    30. Boysen G. The Glutathione Conundrum: Stoichiometric Disconnect between Its  
10        Formation and Oxidative Stress. *CHEM RES TOXICOL* 2017;30:1113-6.
- 11   31. Wang X, Chen H, Liu J, Ouyang Y, Wang D , Bao W et al. Association between the  
12        NF-E2 Related Factor 2 Gene Polymorphism and Oxidative Stress, Anti-Oxidative  
13        Status, and Newly-Diagnosed Type 2 Diabetes Mellitus in a Chinese Population.  
14        *INT J MOL SCI* 2015;16:16483-96.
- 15   32. Wang HY, Liang CM, Cui JW, Pan L, Hu H , Fang HJ. [Acupuncture improves  
16        hepatic lipid metabolism by suppressing oxidative stress in obese nonalcoholic fatty  
17        liver disease rats]. *Zhen Ci Yan Jiu* 2019;44:189-94.
- 18   33. Zhang C, Hu J, Sheng L, Yuan M, Wu Y , Chen L et al. Ellagic acid ameliorates AKT-  
19        driven hepatic steatosis in mice by suppressing *de novo* lipogenesis via the  
20        AKT/SREBP-1/FASN pathway. *FOOD FUNCT* 2019;10:3410-20.
- 21   34. Engin A. Non-Alcoholic Fatty Liver Disease. *ADV EXP MED BIOL* 2017;960:443-  
22        67.
- 23   35. Satapati S, Kucejova B, Duarte JAG, Fletcher JA, Reynolds L , Sunny NE et al.  
24        Mitochondrial metabolism mediates oxidative stress and inflammation in fatty liver.  
25        *J CLIN INVEST* 2015;125:4447-62.



- 1 36. Martinez-Samano J, Flores-Poblano A, Verdugo-Diaz L, Juarez-Oropeza MA ,  
2 Torres-Duran PV. Extremely low frequency electromagnetic field exposure and  
3 restraint stress induce changes on the brain lipid profile of Wistar rats. BMC  
4 NEUROSCI 2018;19:31.
- 5 37. Sun Y, Huang X, Wang Y, Shi Z, Liao Y , Cai P. Lipidomic alteration and stress-  
6 defense mechanism of soil nematode *Caenorhabditis elegans* in response to extremely  
7 low-frequency electromagnetic field exposure. ECOTOX ENVIRON SAFE  
8 2019;170:611-9.
- 9 38. Shimomura I, Shimano H, Horton JD, Goldstein JL , Brown MS. Differential  
10 expression of exons 1a and 1c in mRNAs for sterol regulatory element binding  
11 protein-1 in human and mouse organs and cultured cells. The Journal of clinical  
12 investigation 1997;99:838-45.
- 13 39. Ferré P , Foufelle F. SREBP-1c Transcription Factor and Lipid Homeostasis: Clinical  
14 Perspective. HORM RES PAEDIAT 2007;68:72-82.
- 15 40. Huang F, Wang J, Yu F, Tang Y, Ding G , Yang Z et al. Protective Effect of Meretrix  
16 meretrix Oligopeptides on High-Fat-Diet-Induced Non-Alcoholic Fatty Liver Disease  
17 in Mice. MAR DRUGS 2018;16:39.
- 18 41. Feng R, Fan C, Liu Q, Liu Z, Zhang W , Li Y et al. Crude triterpenoid saponins from  
19 *Ilex latifolia* (Da Ye Dong Qing) ameliorate lipid accumulation by inhibiting SREBP  
20 expression via activation of AMPK in a non-alcoholic fatty liver disease model. CHIN  
21 MED-UK 2015;10.

22

## 1 Figure Legends

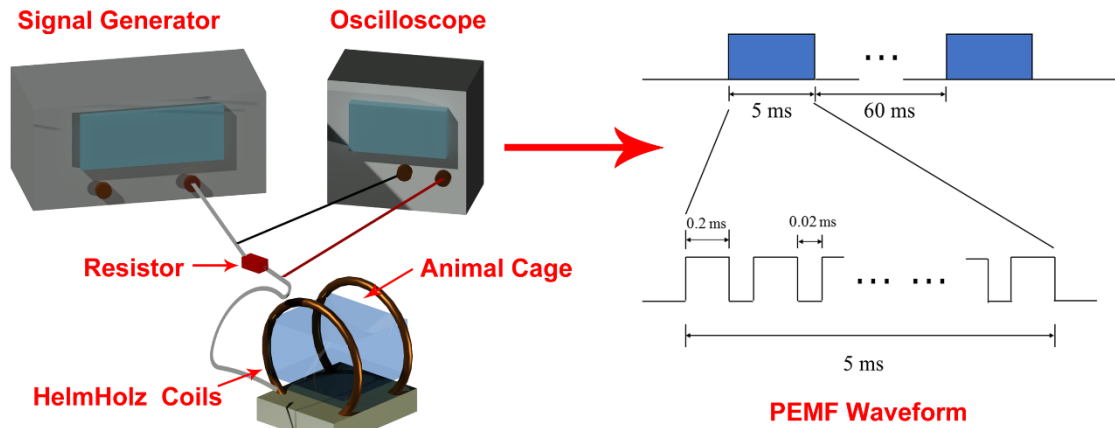

2

3 Figure 1: Schematic representation of PEMF exposure system and output waveform. The  
 4 exposure waveform comprises a pulsed burst (burst width, 5 ms; pulse width, 0.2 ms;  
 5 pulse wait, 0.02 ms; burst wait, 60 ms; pulse rise, 0.3  $\mu$ s; pulse fall, 2.0  $\mu$ s) repeated at  
 6 15.38 Hz.

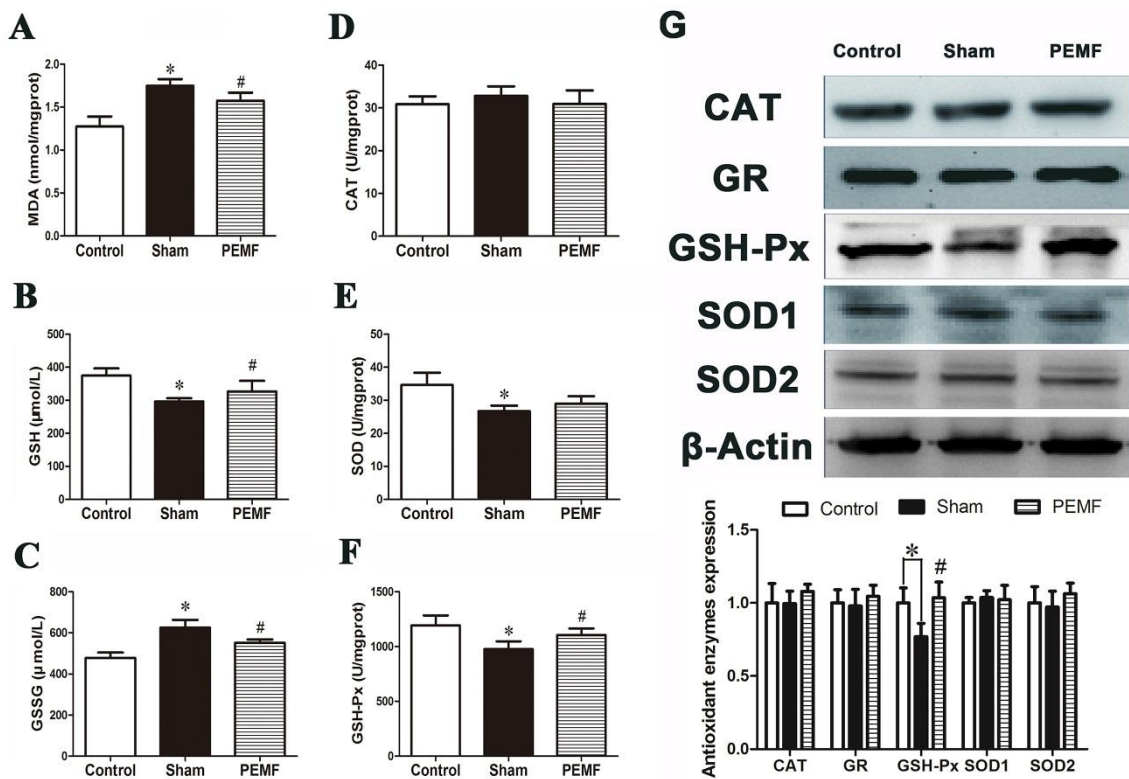

7

8 Figure 2: Effects of PEMF exposure on redox homeostasis of db/db mice. **A** Liver MDA  
 9 content. **B** Liver GSH content. **C** Liver GSSG content. **D** Activity/unit of CAT. **E**

1 Activity/unit of SOD. **F** Activity/unit of GSH-Px. **G** Expression of CAT, GR, GSH-Px,  
2 SOD1 and SOD2 were determined through Western Blotting. Values are all expressed as  
3 mean  $\pm$  SD. \*  $p < 0.05$ , compared with control; #  $p < 0.05$ , compared with sham.

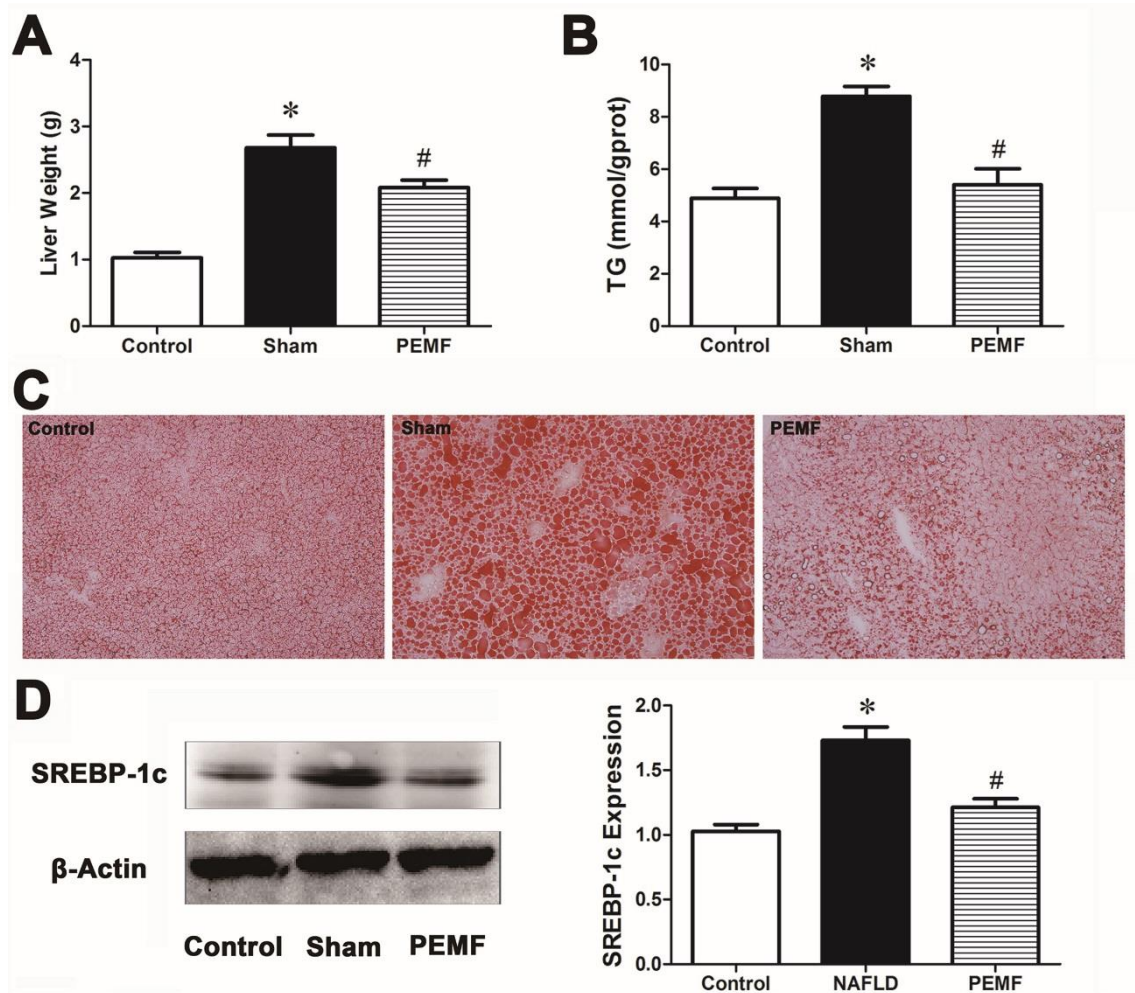

4  
5 Figure 3: The liver change and SREBP-1c expression of mice. **A** Weight of liver. **B** Liver  
6 triglyceride content was measured with commercial available kits. **C** Liver lipid  
7 accumulation was evaluated by Oil Red O staining ( $\times 200$ ). **D** Liver SREBP-1c expression  
8 was determined by Western Blotting. Values are all expressed as mean  $\pm$  SD. \*  $p < 0.05$ ,  
9 compared with control; #  $p < 0.05$ , compared with sham.

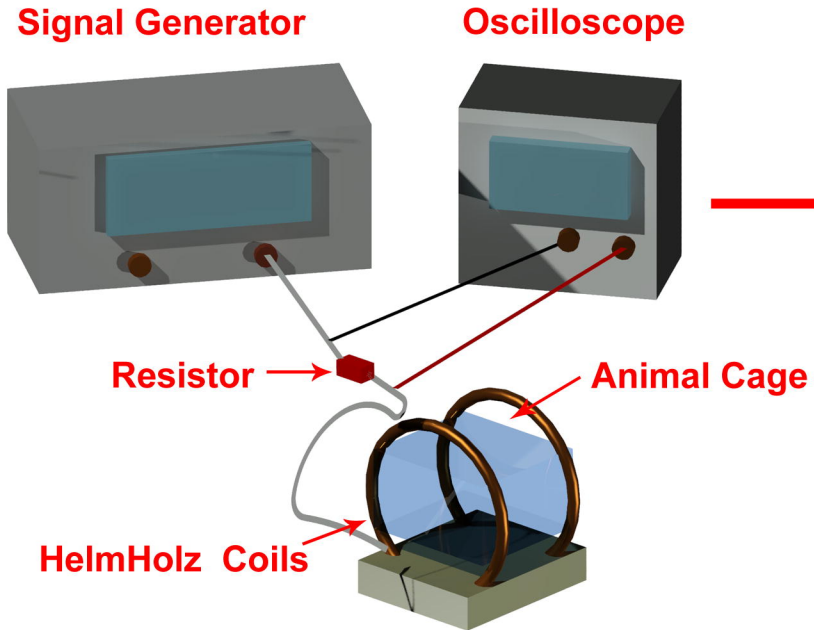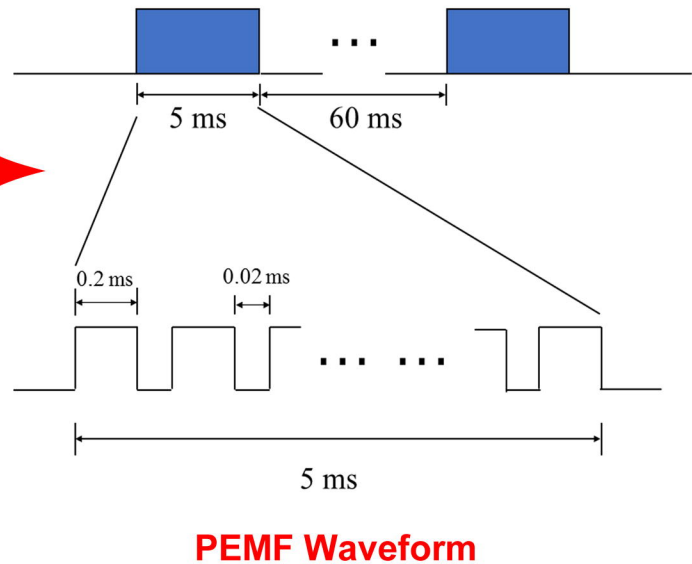



**A**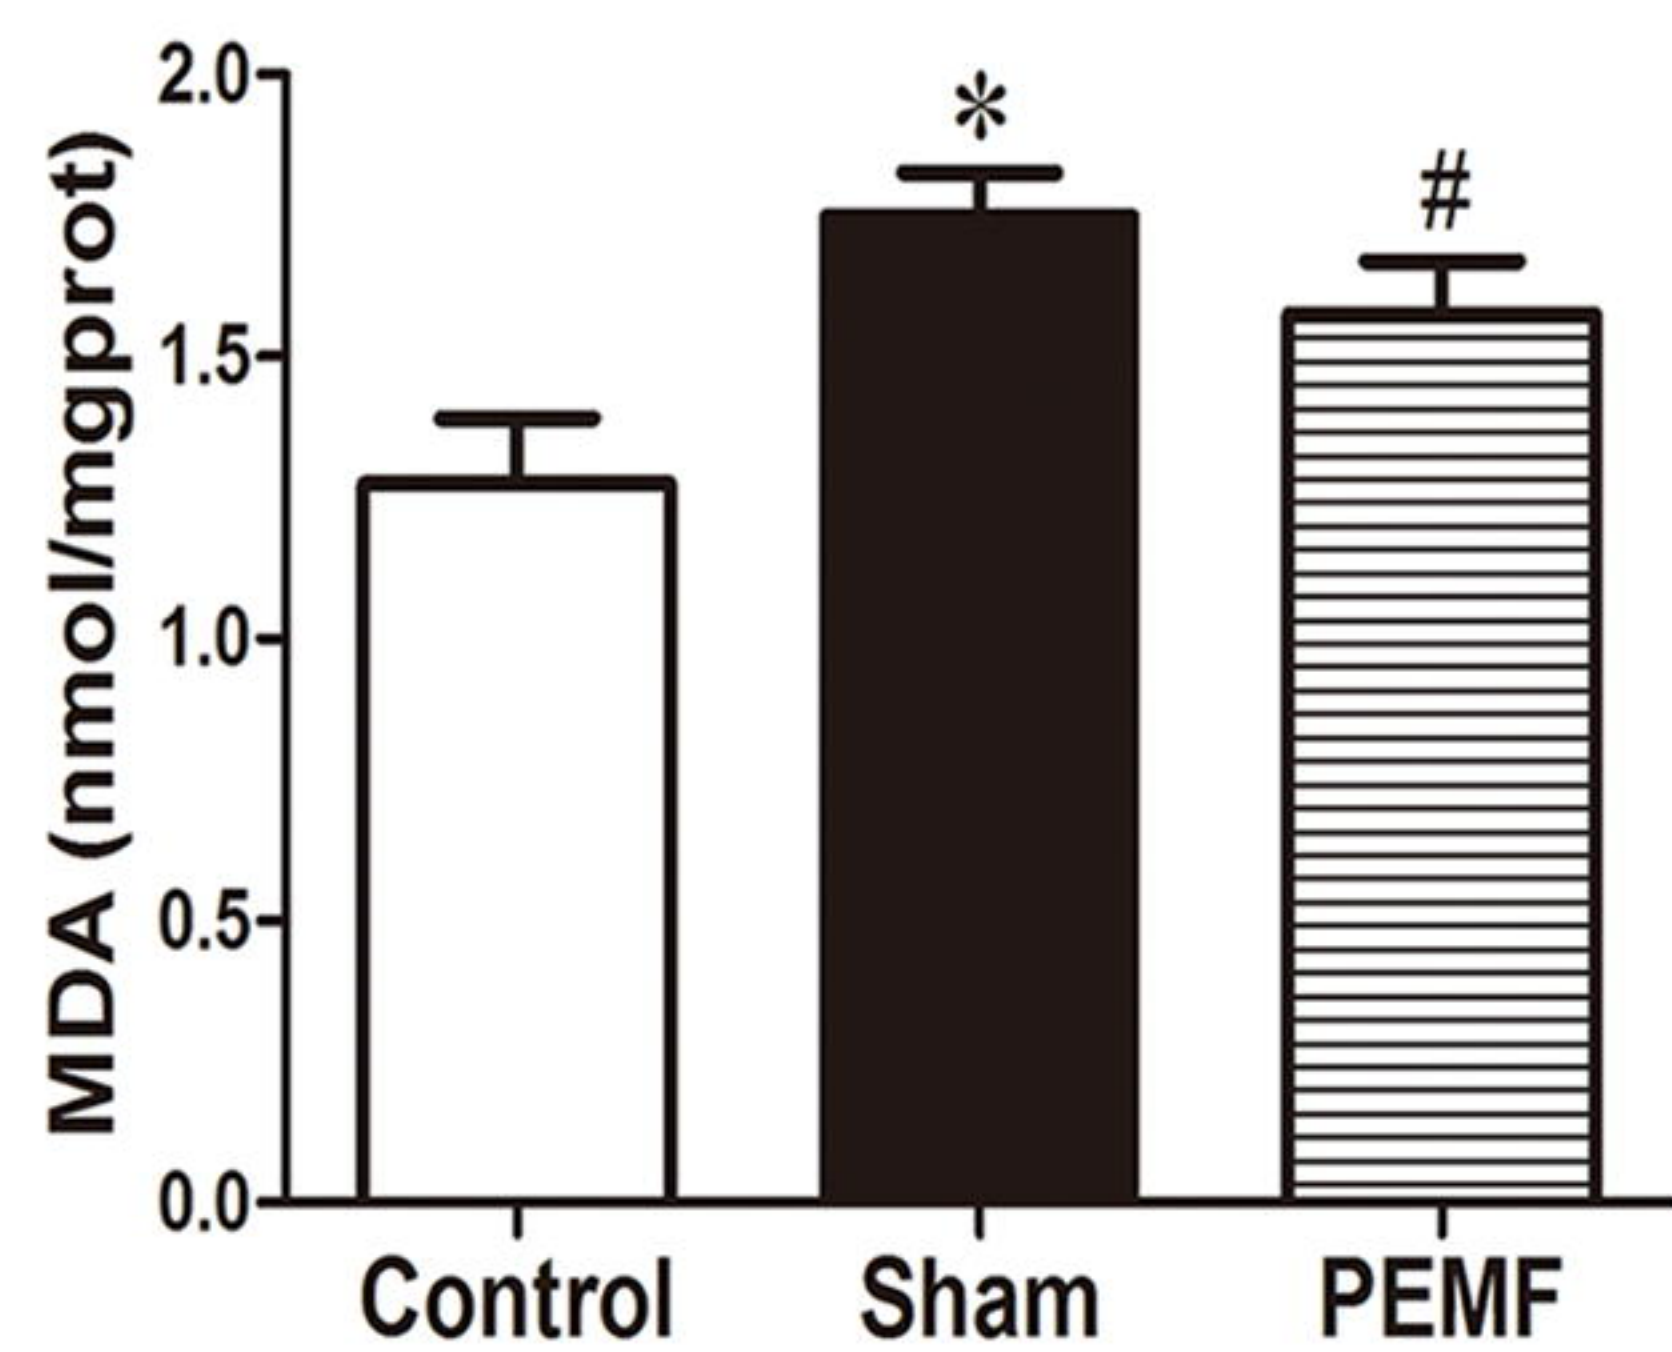**B**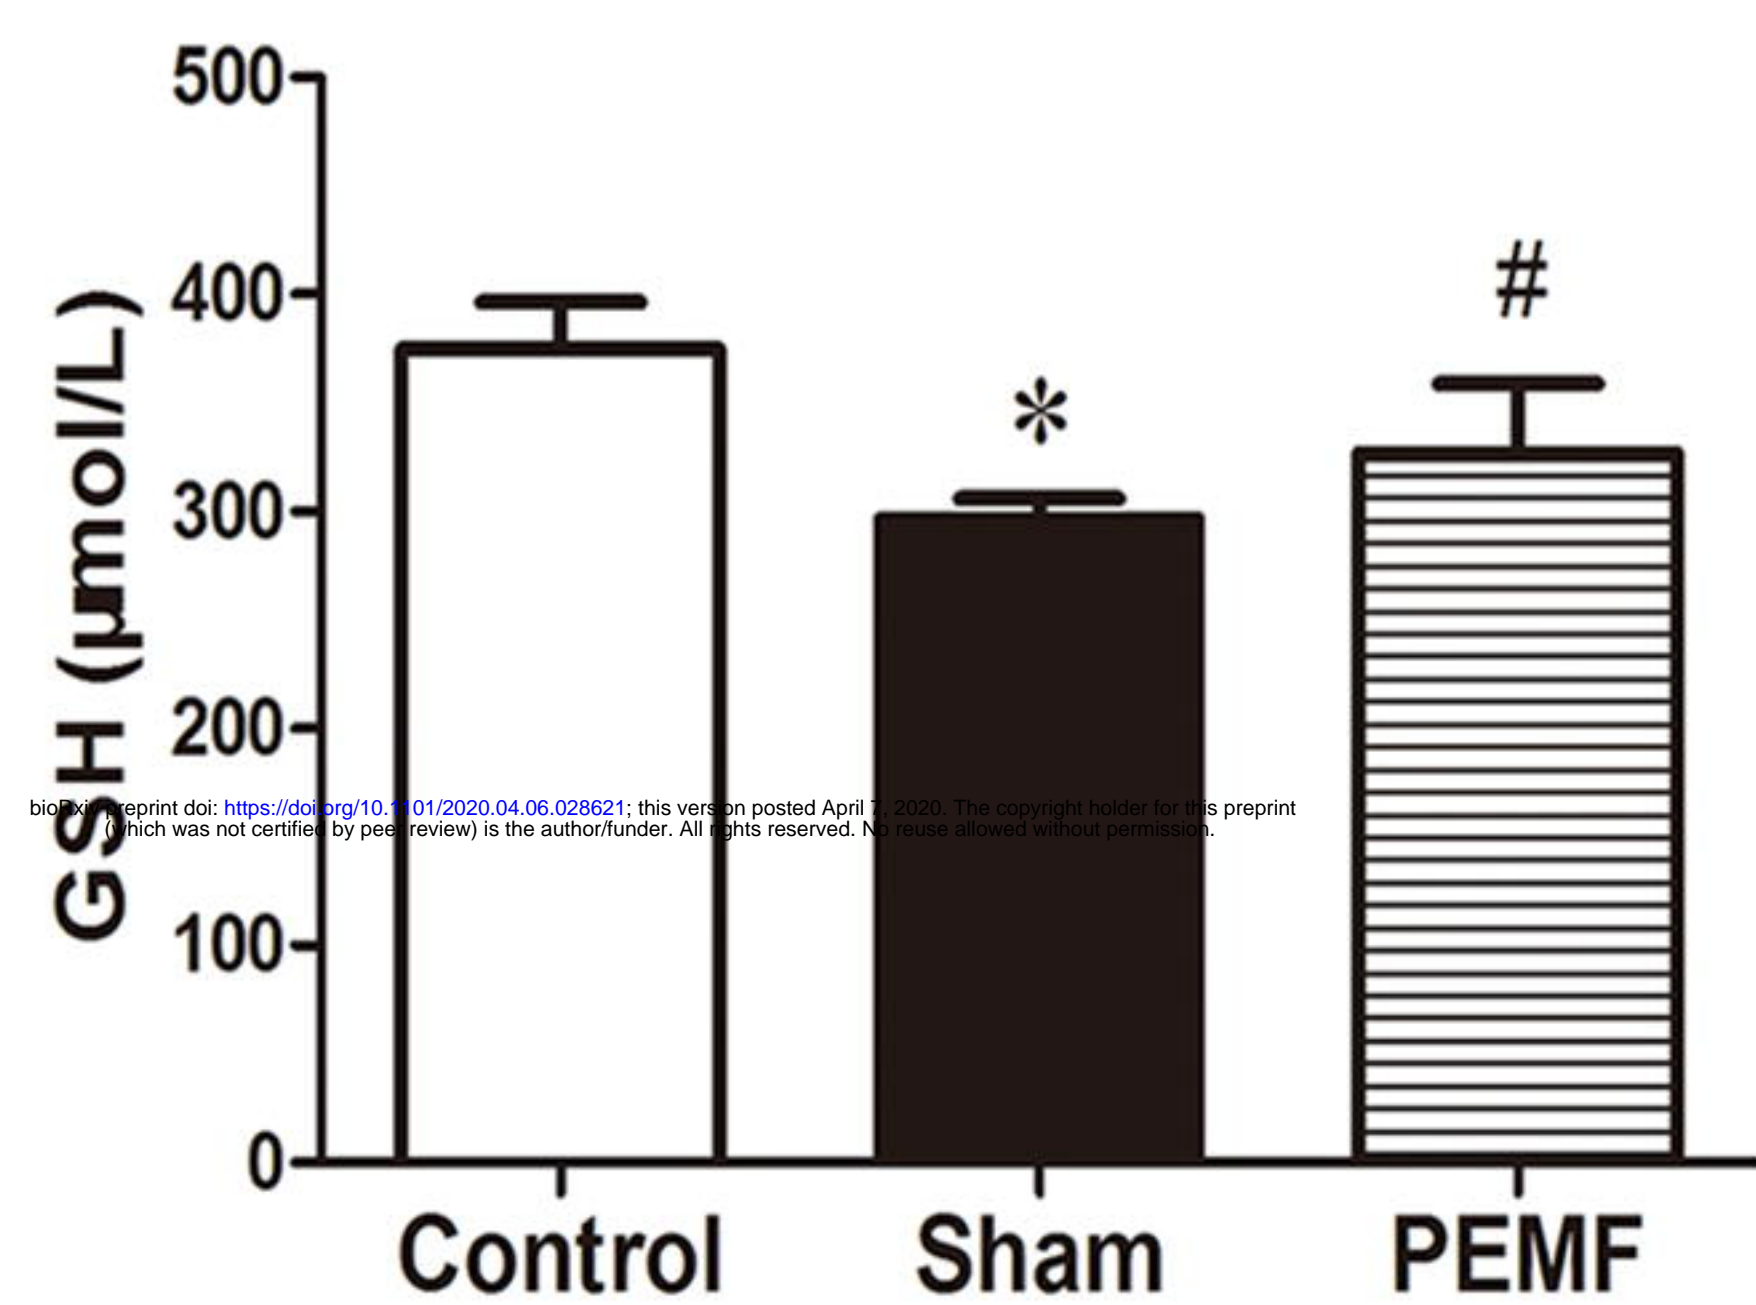**C**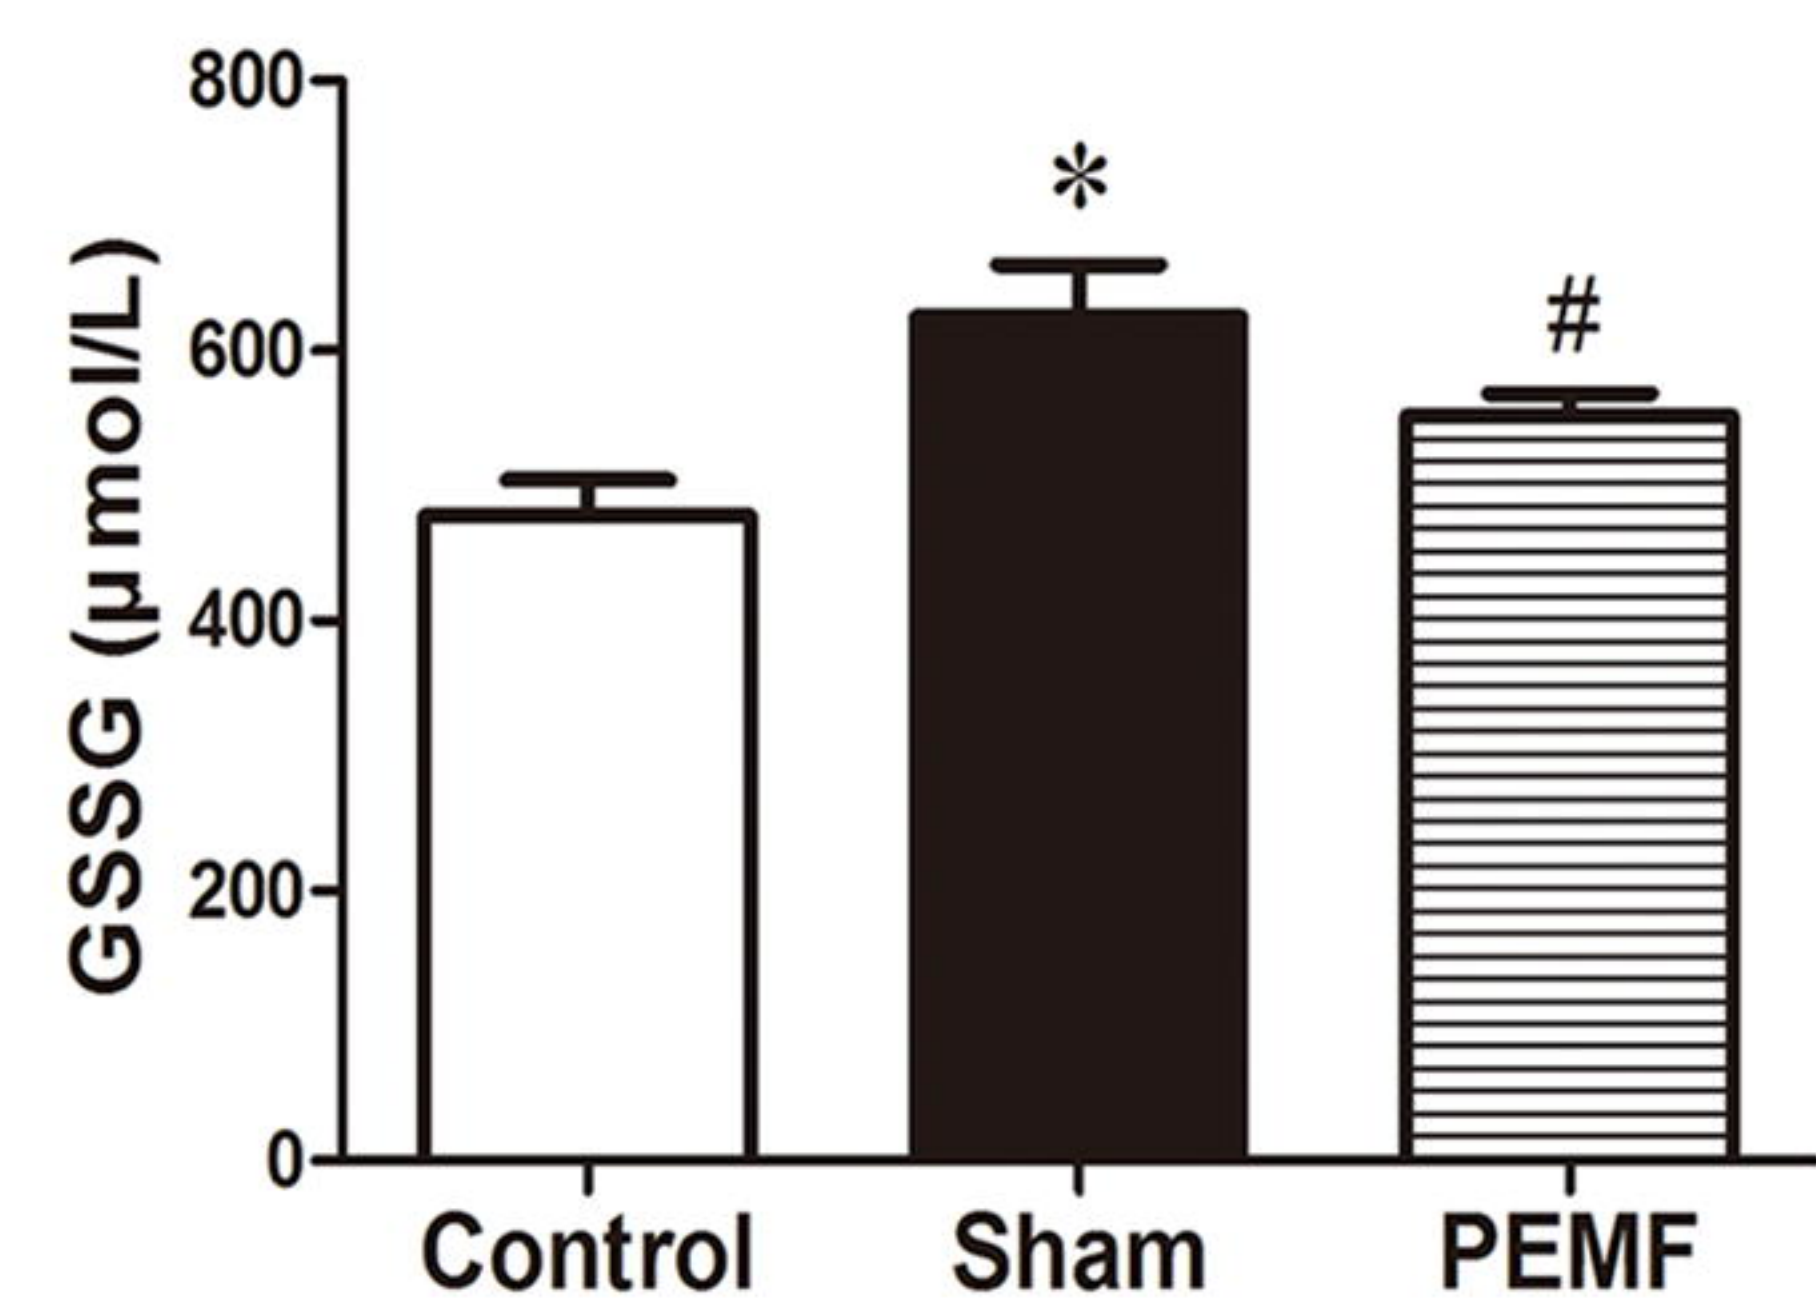**D**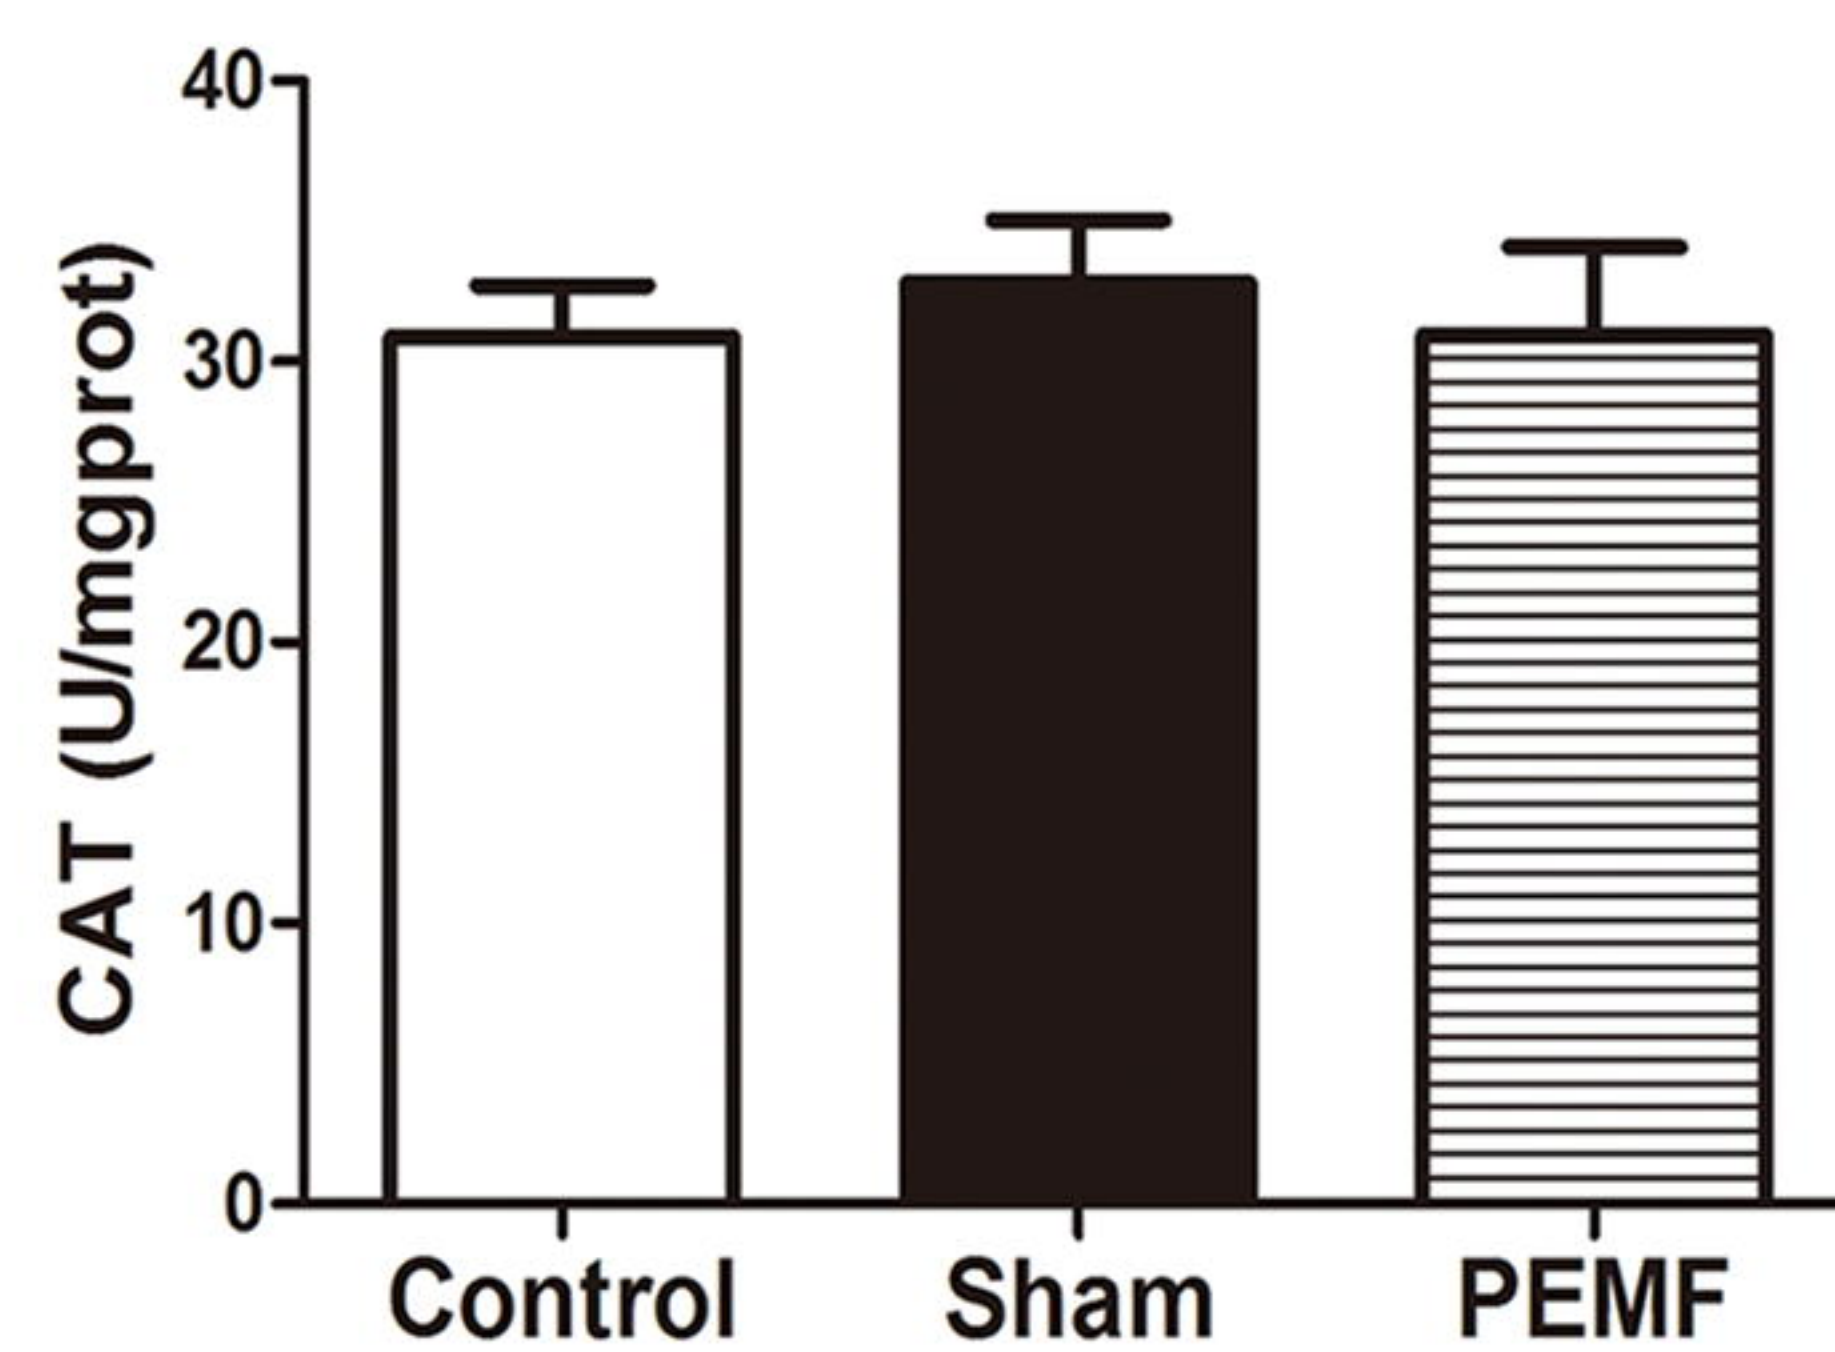**E**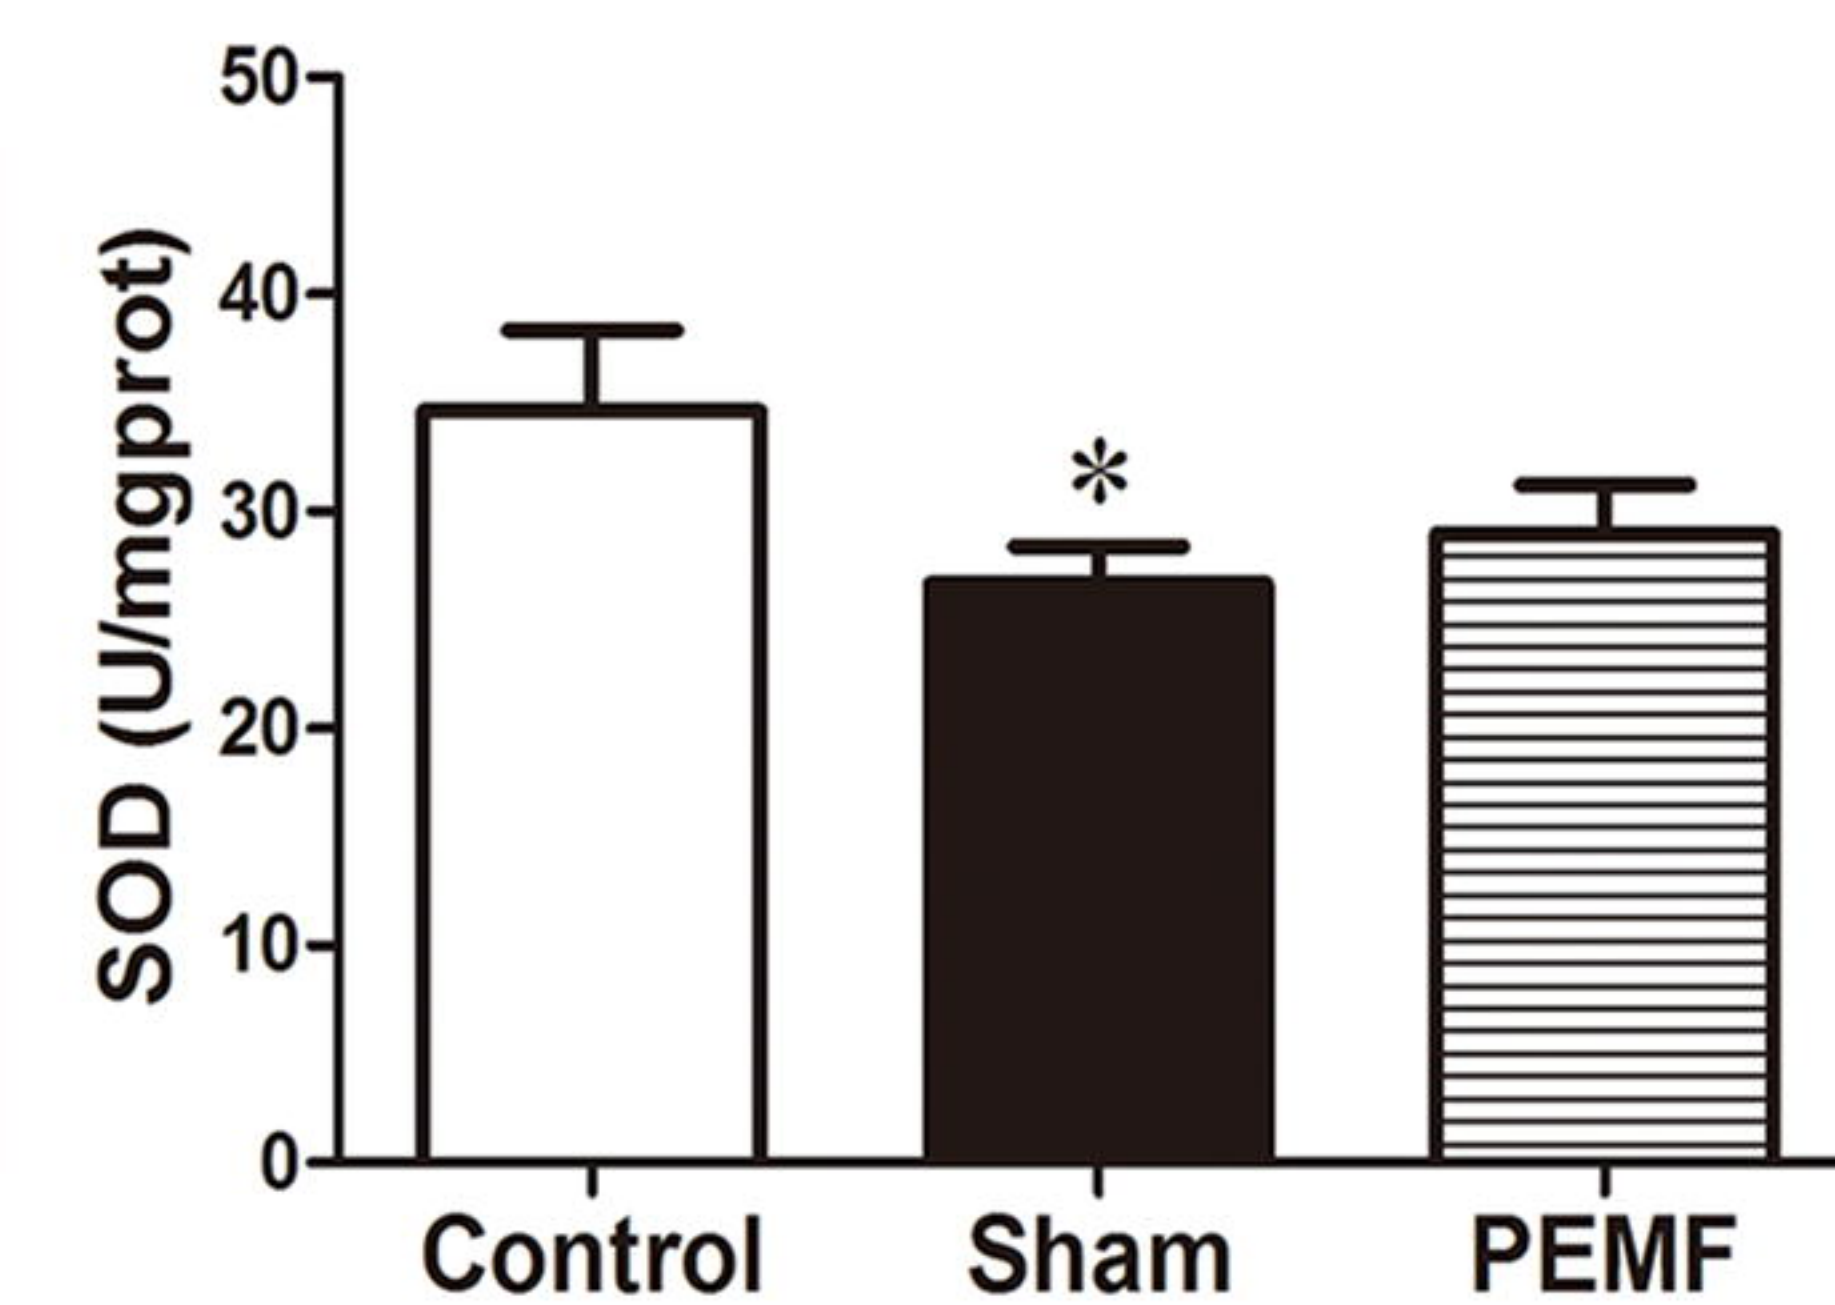**F**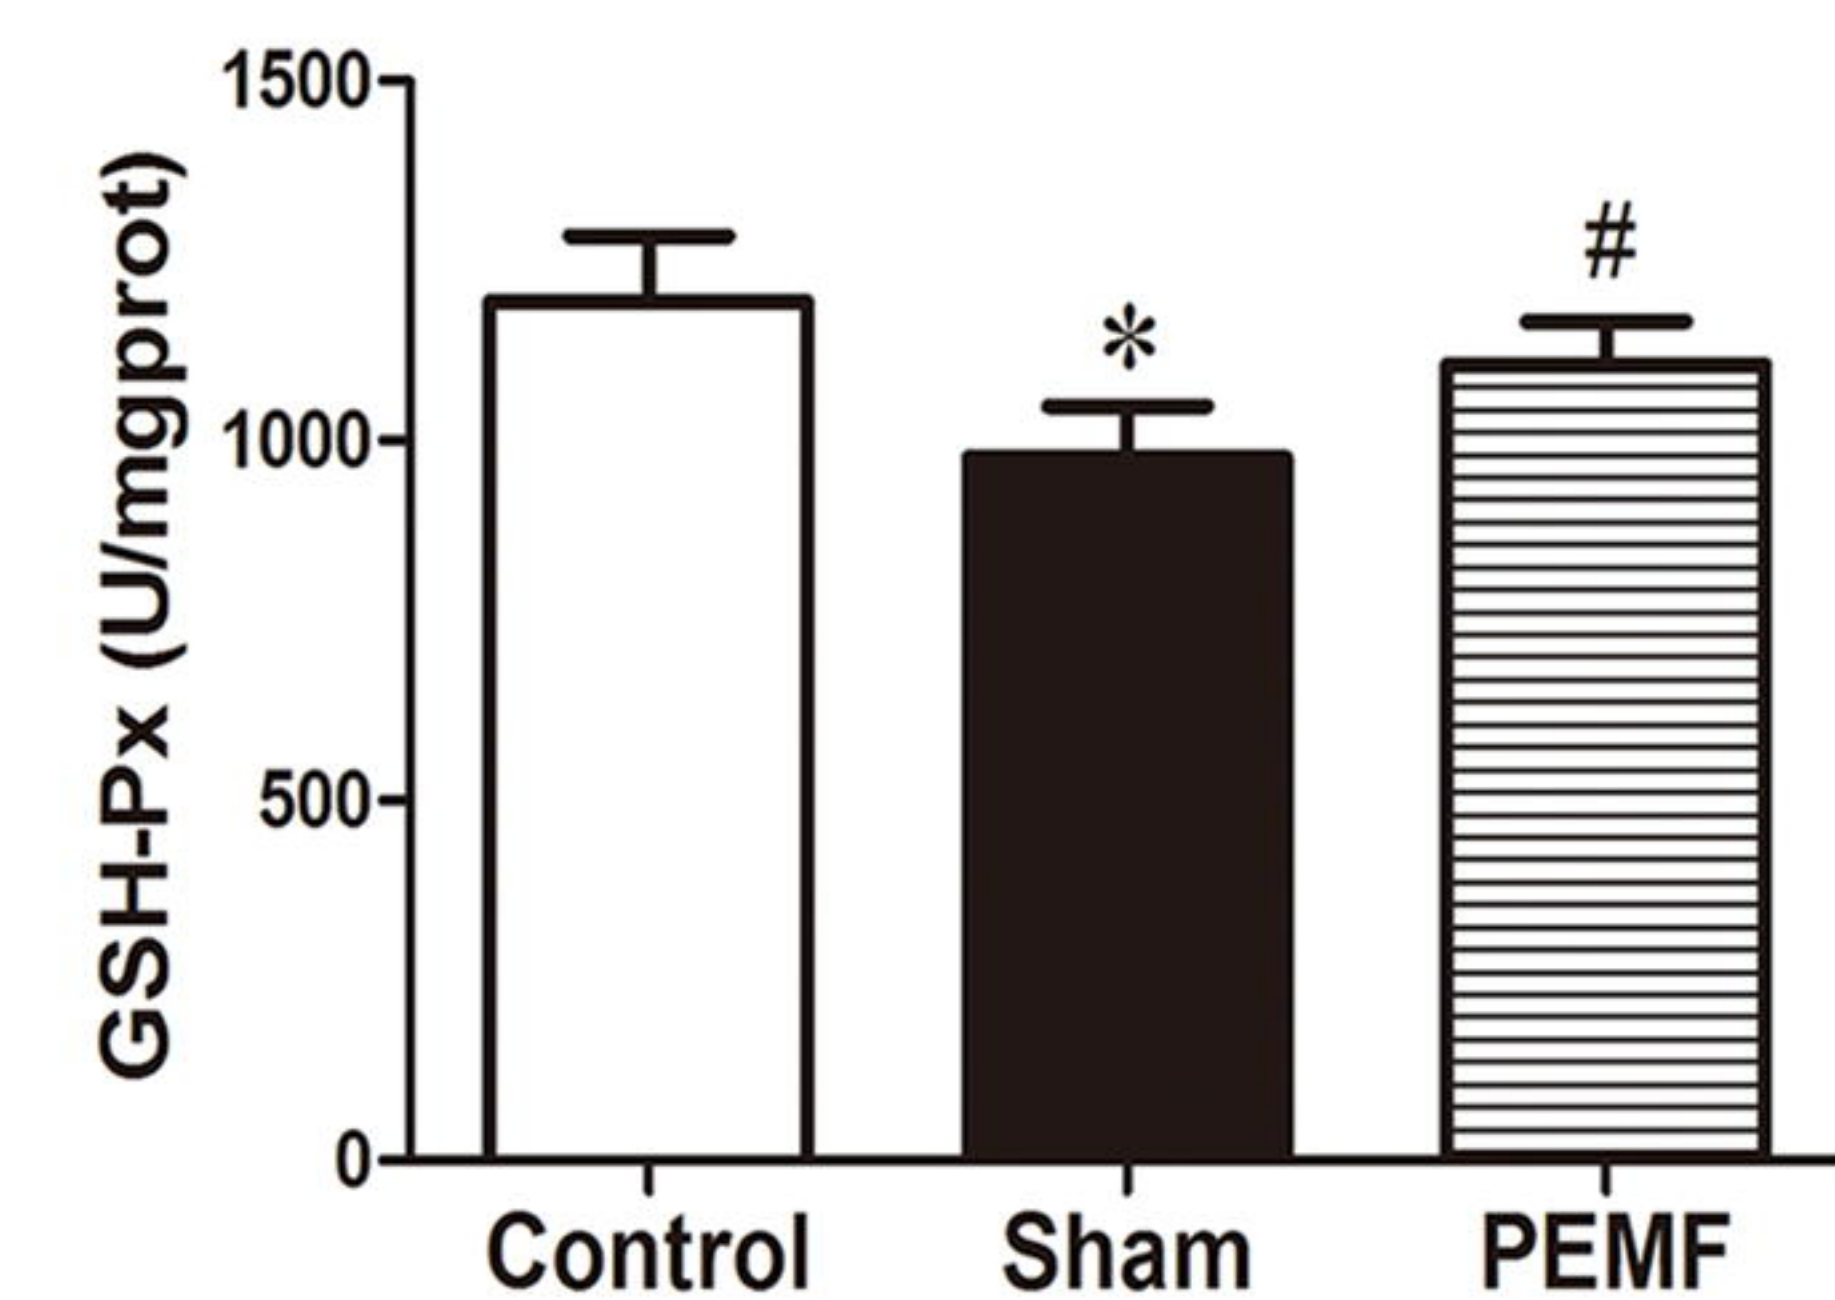**G**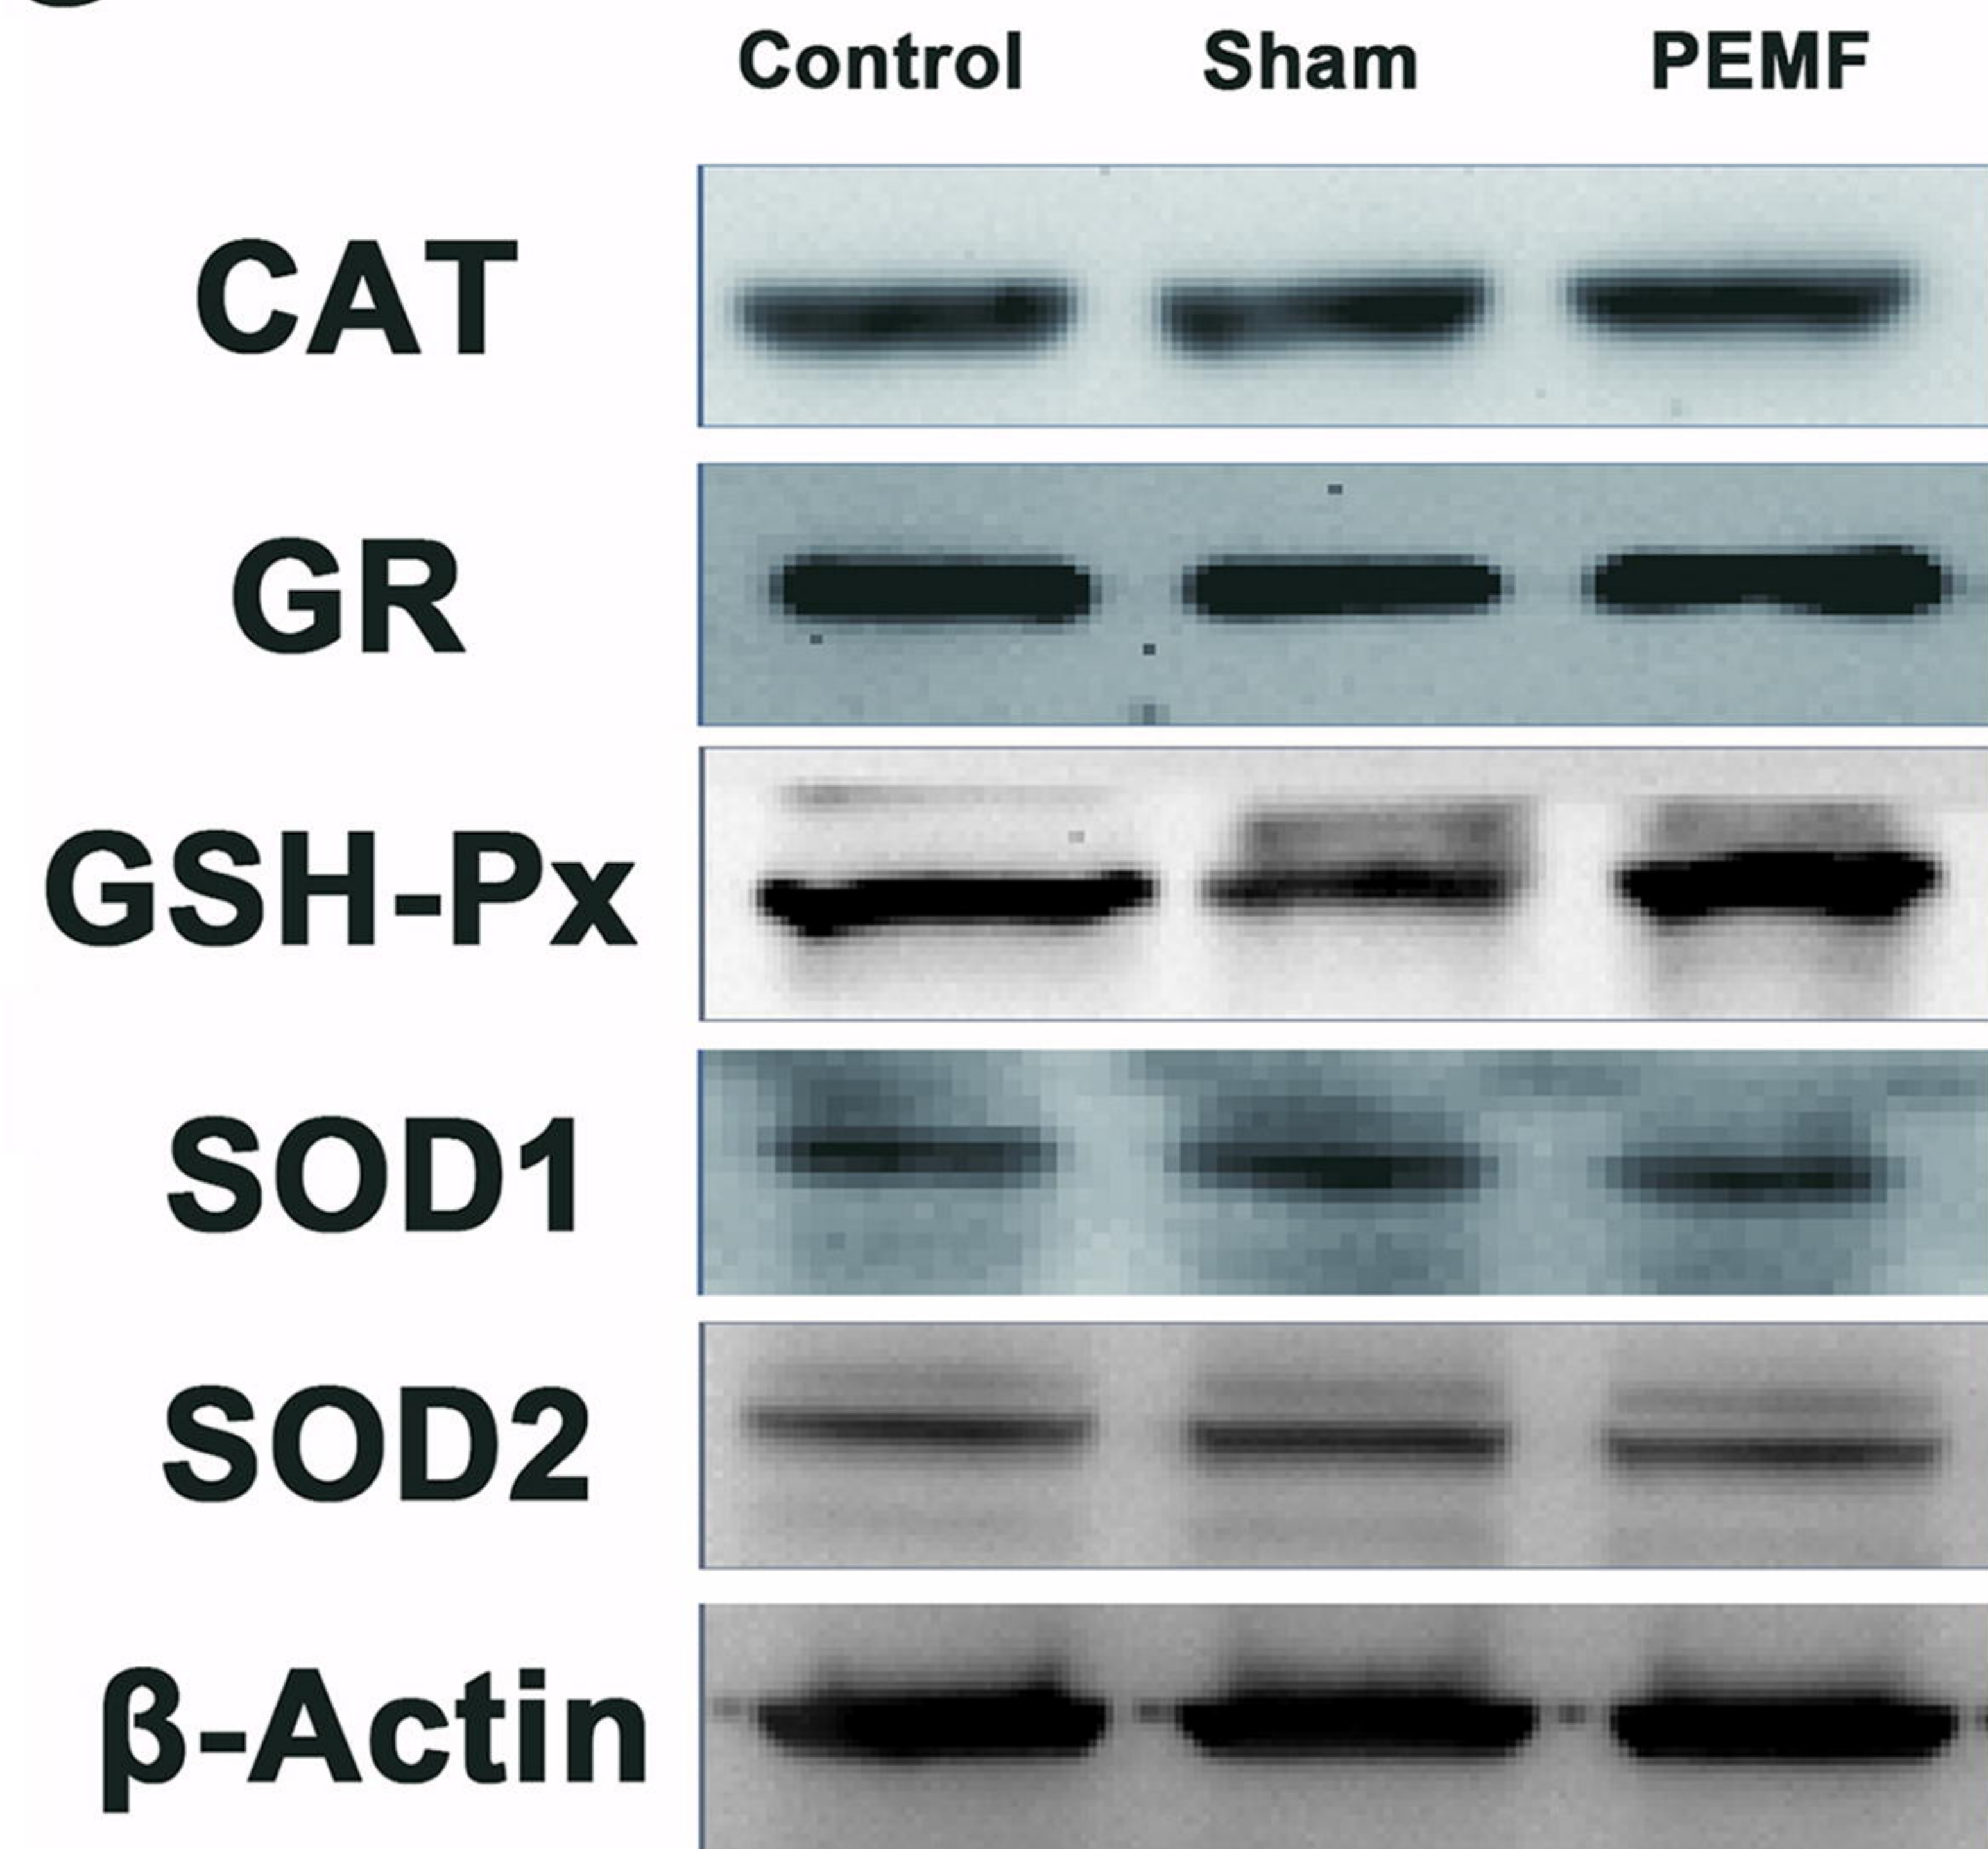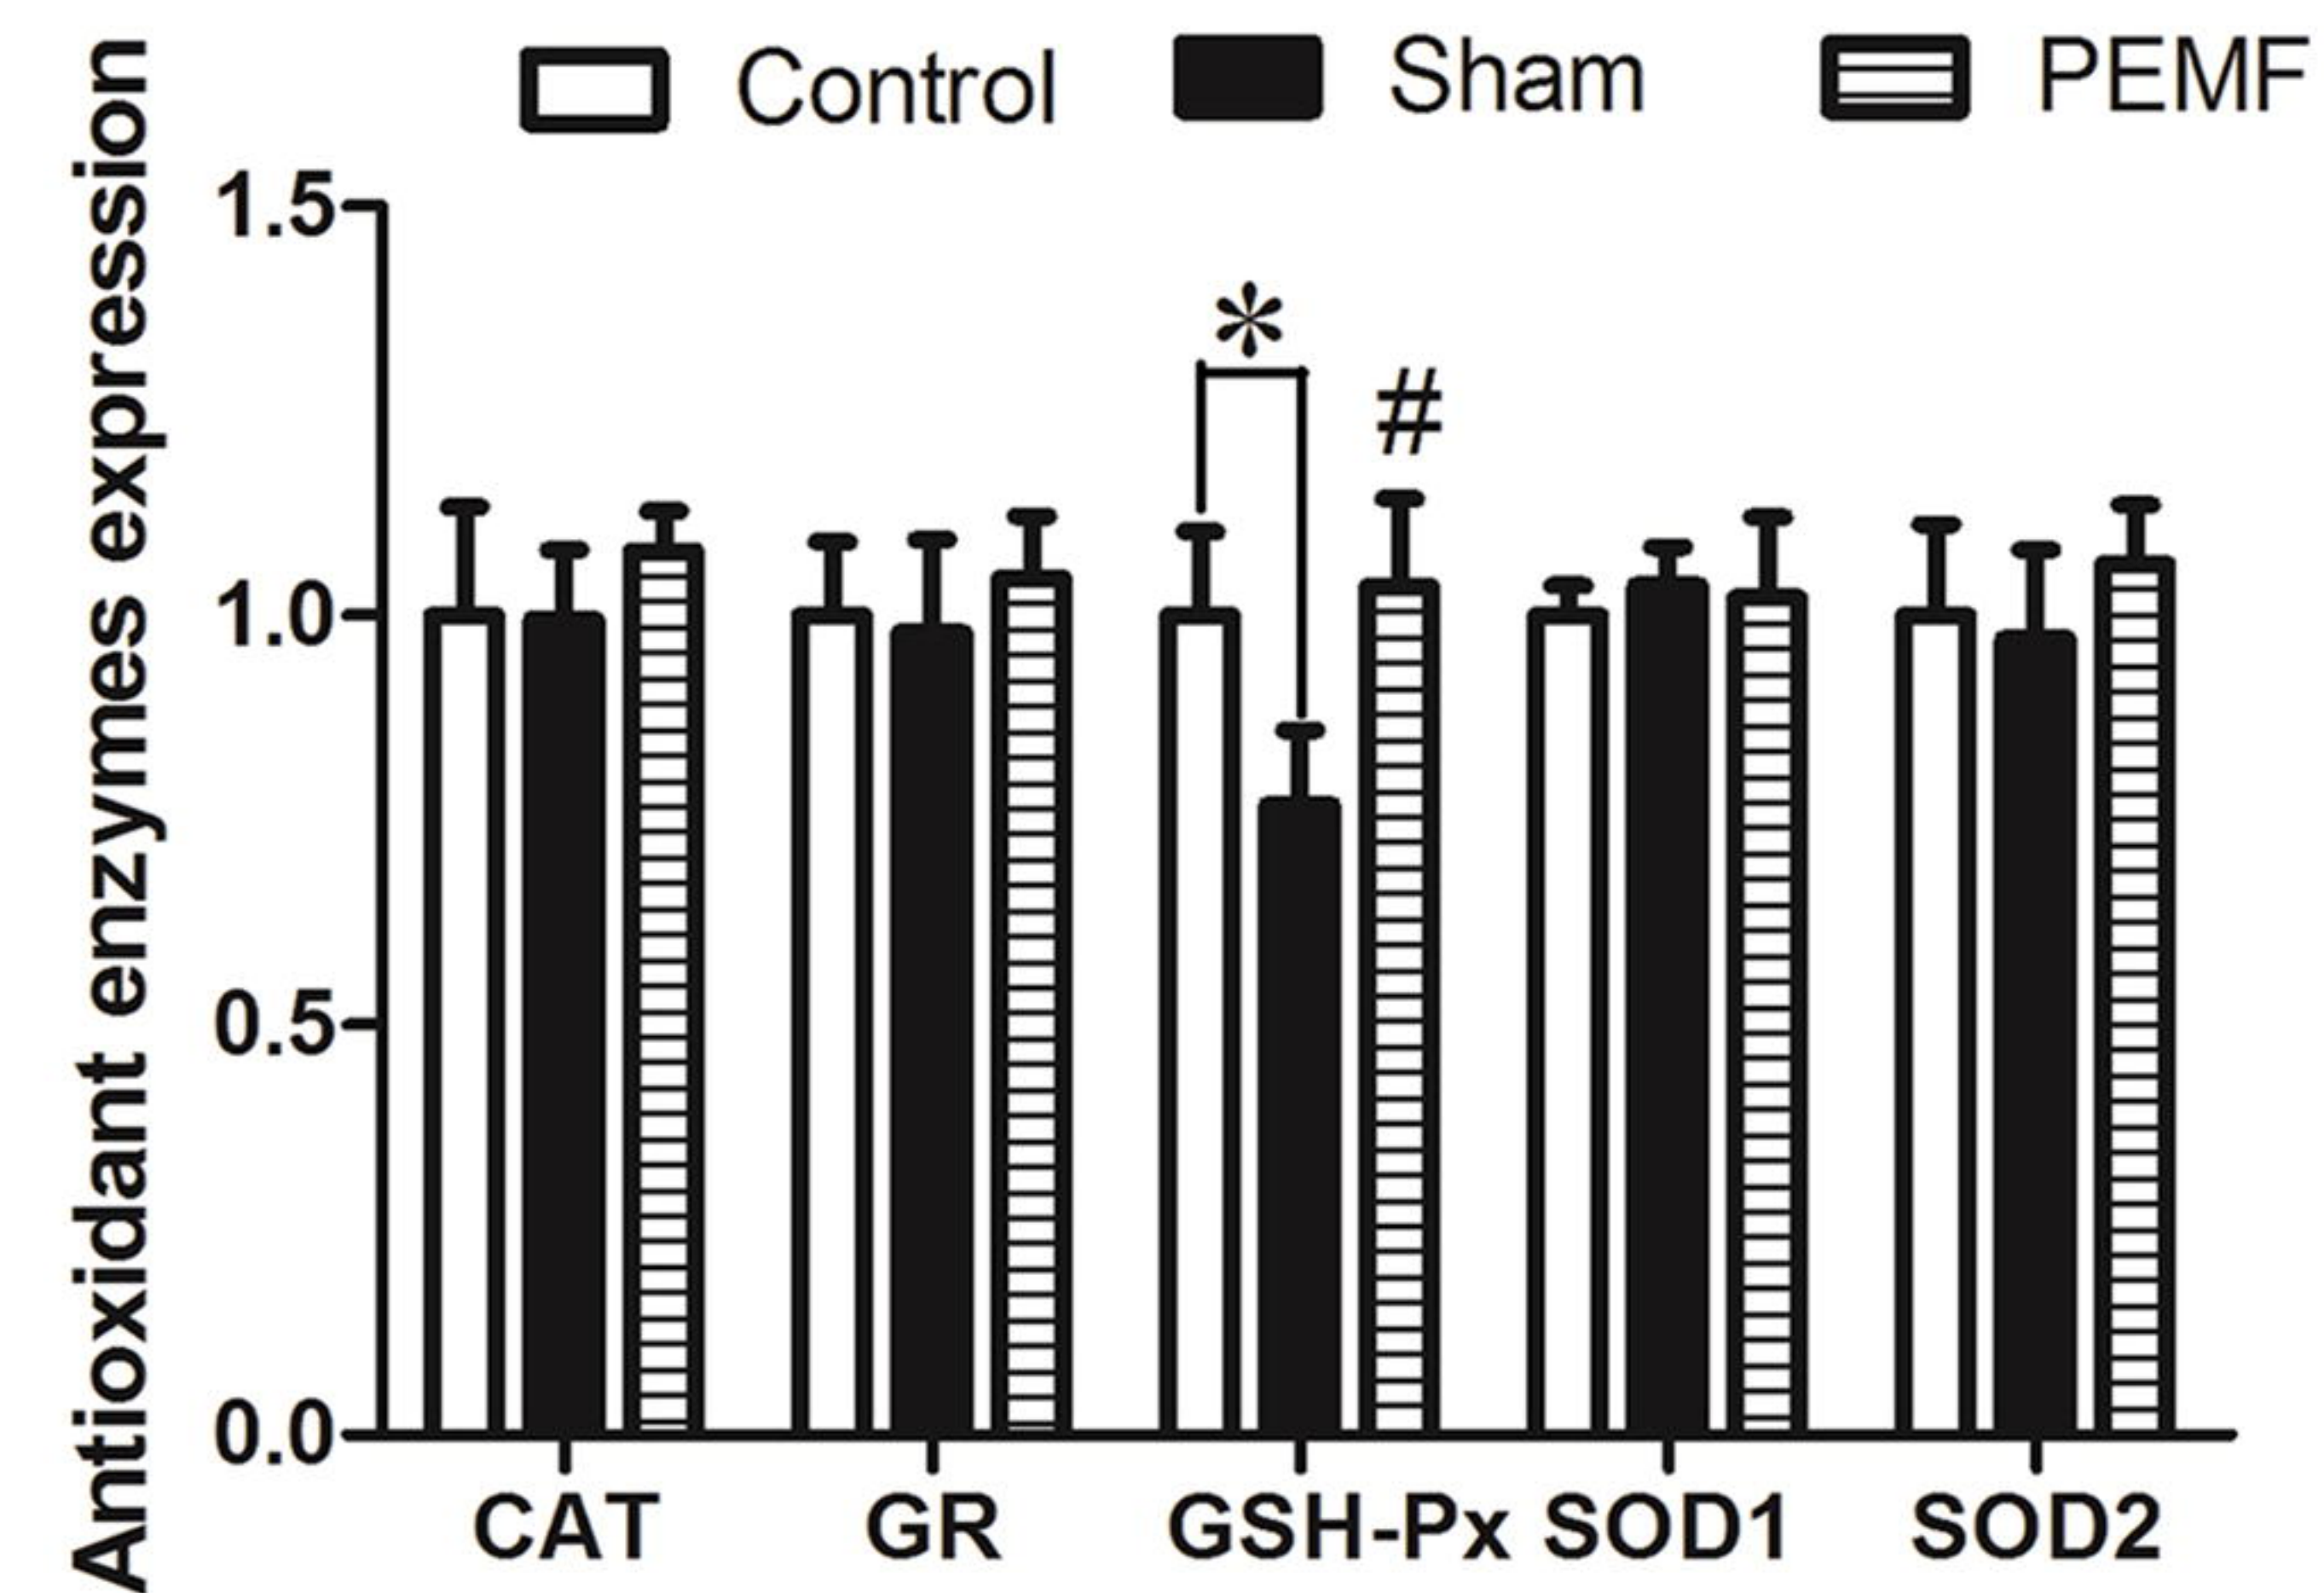



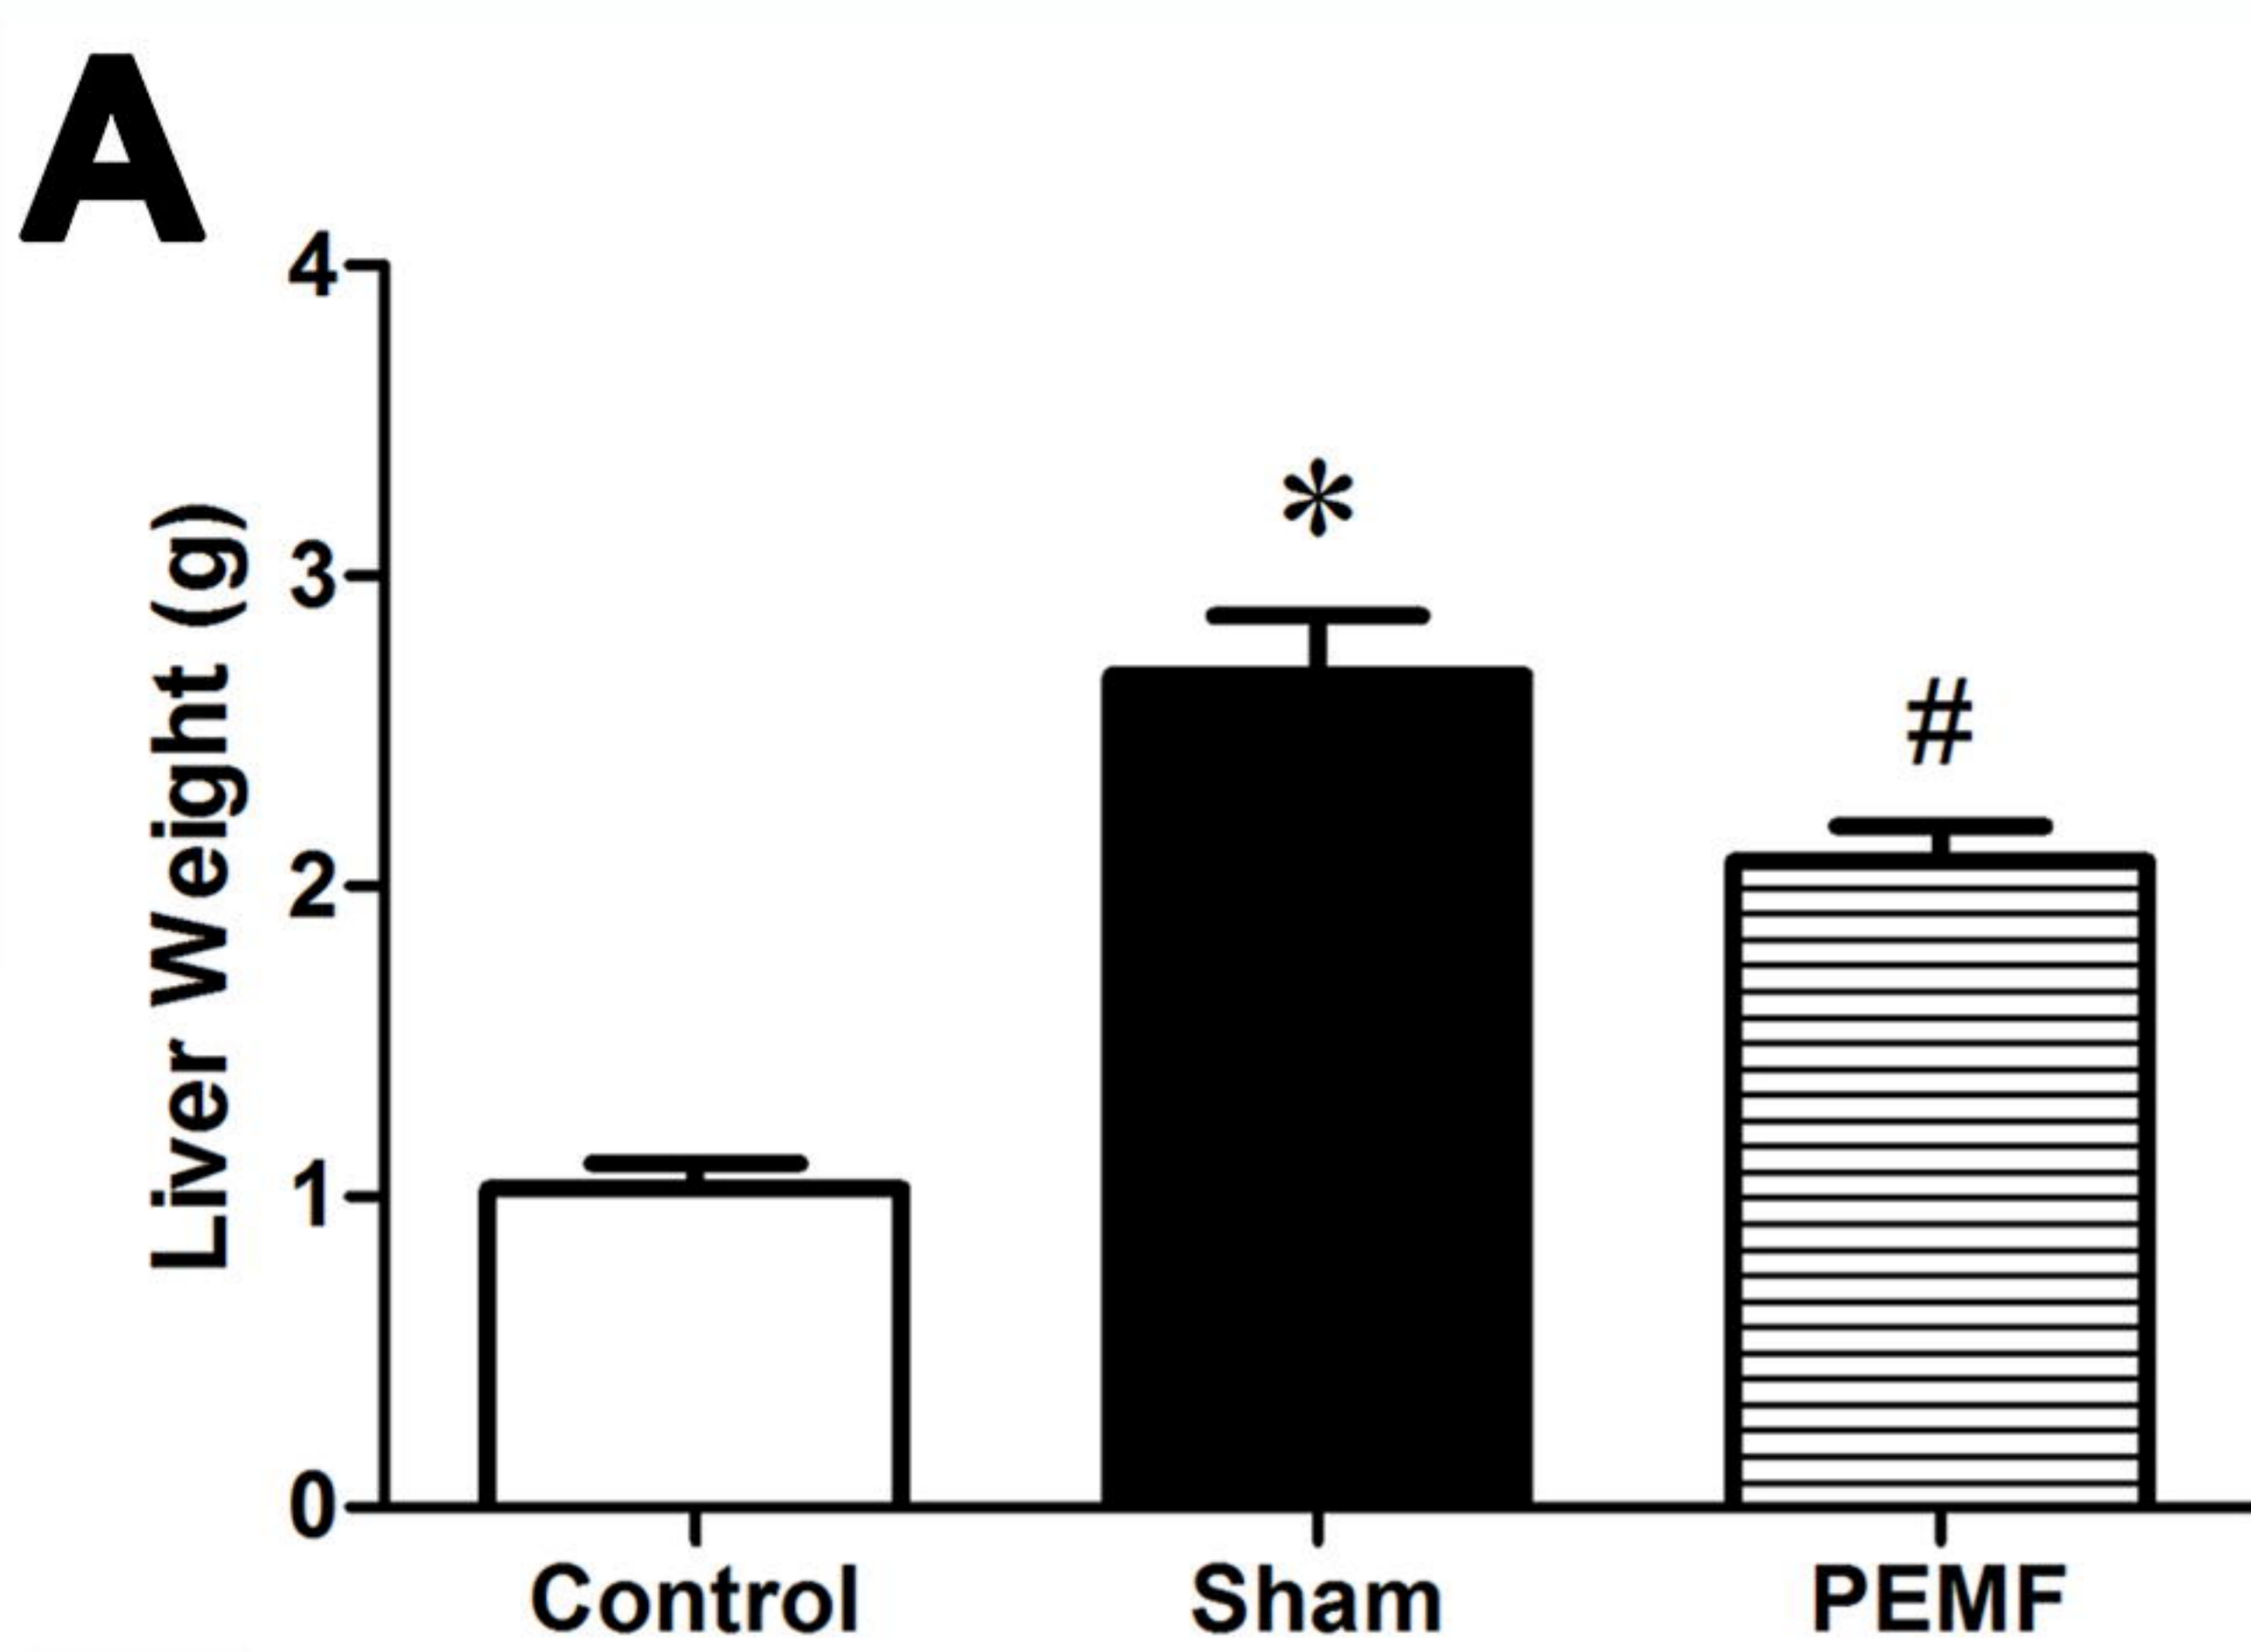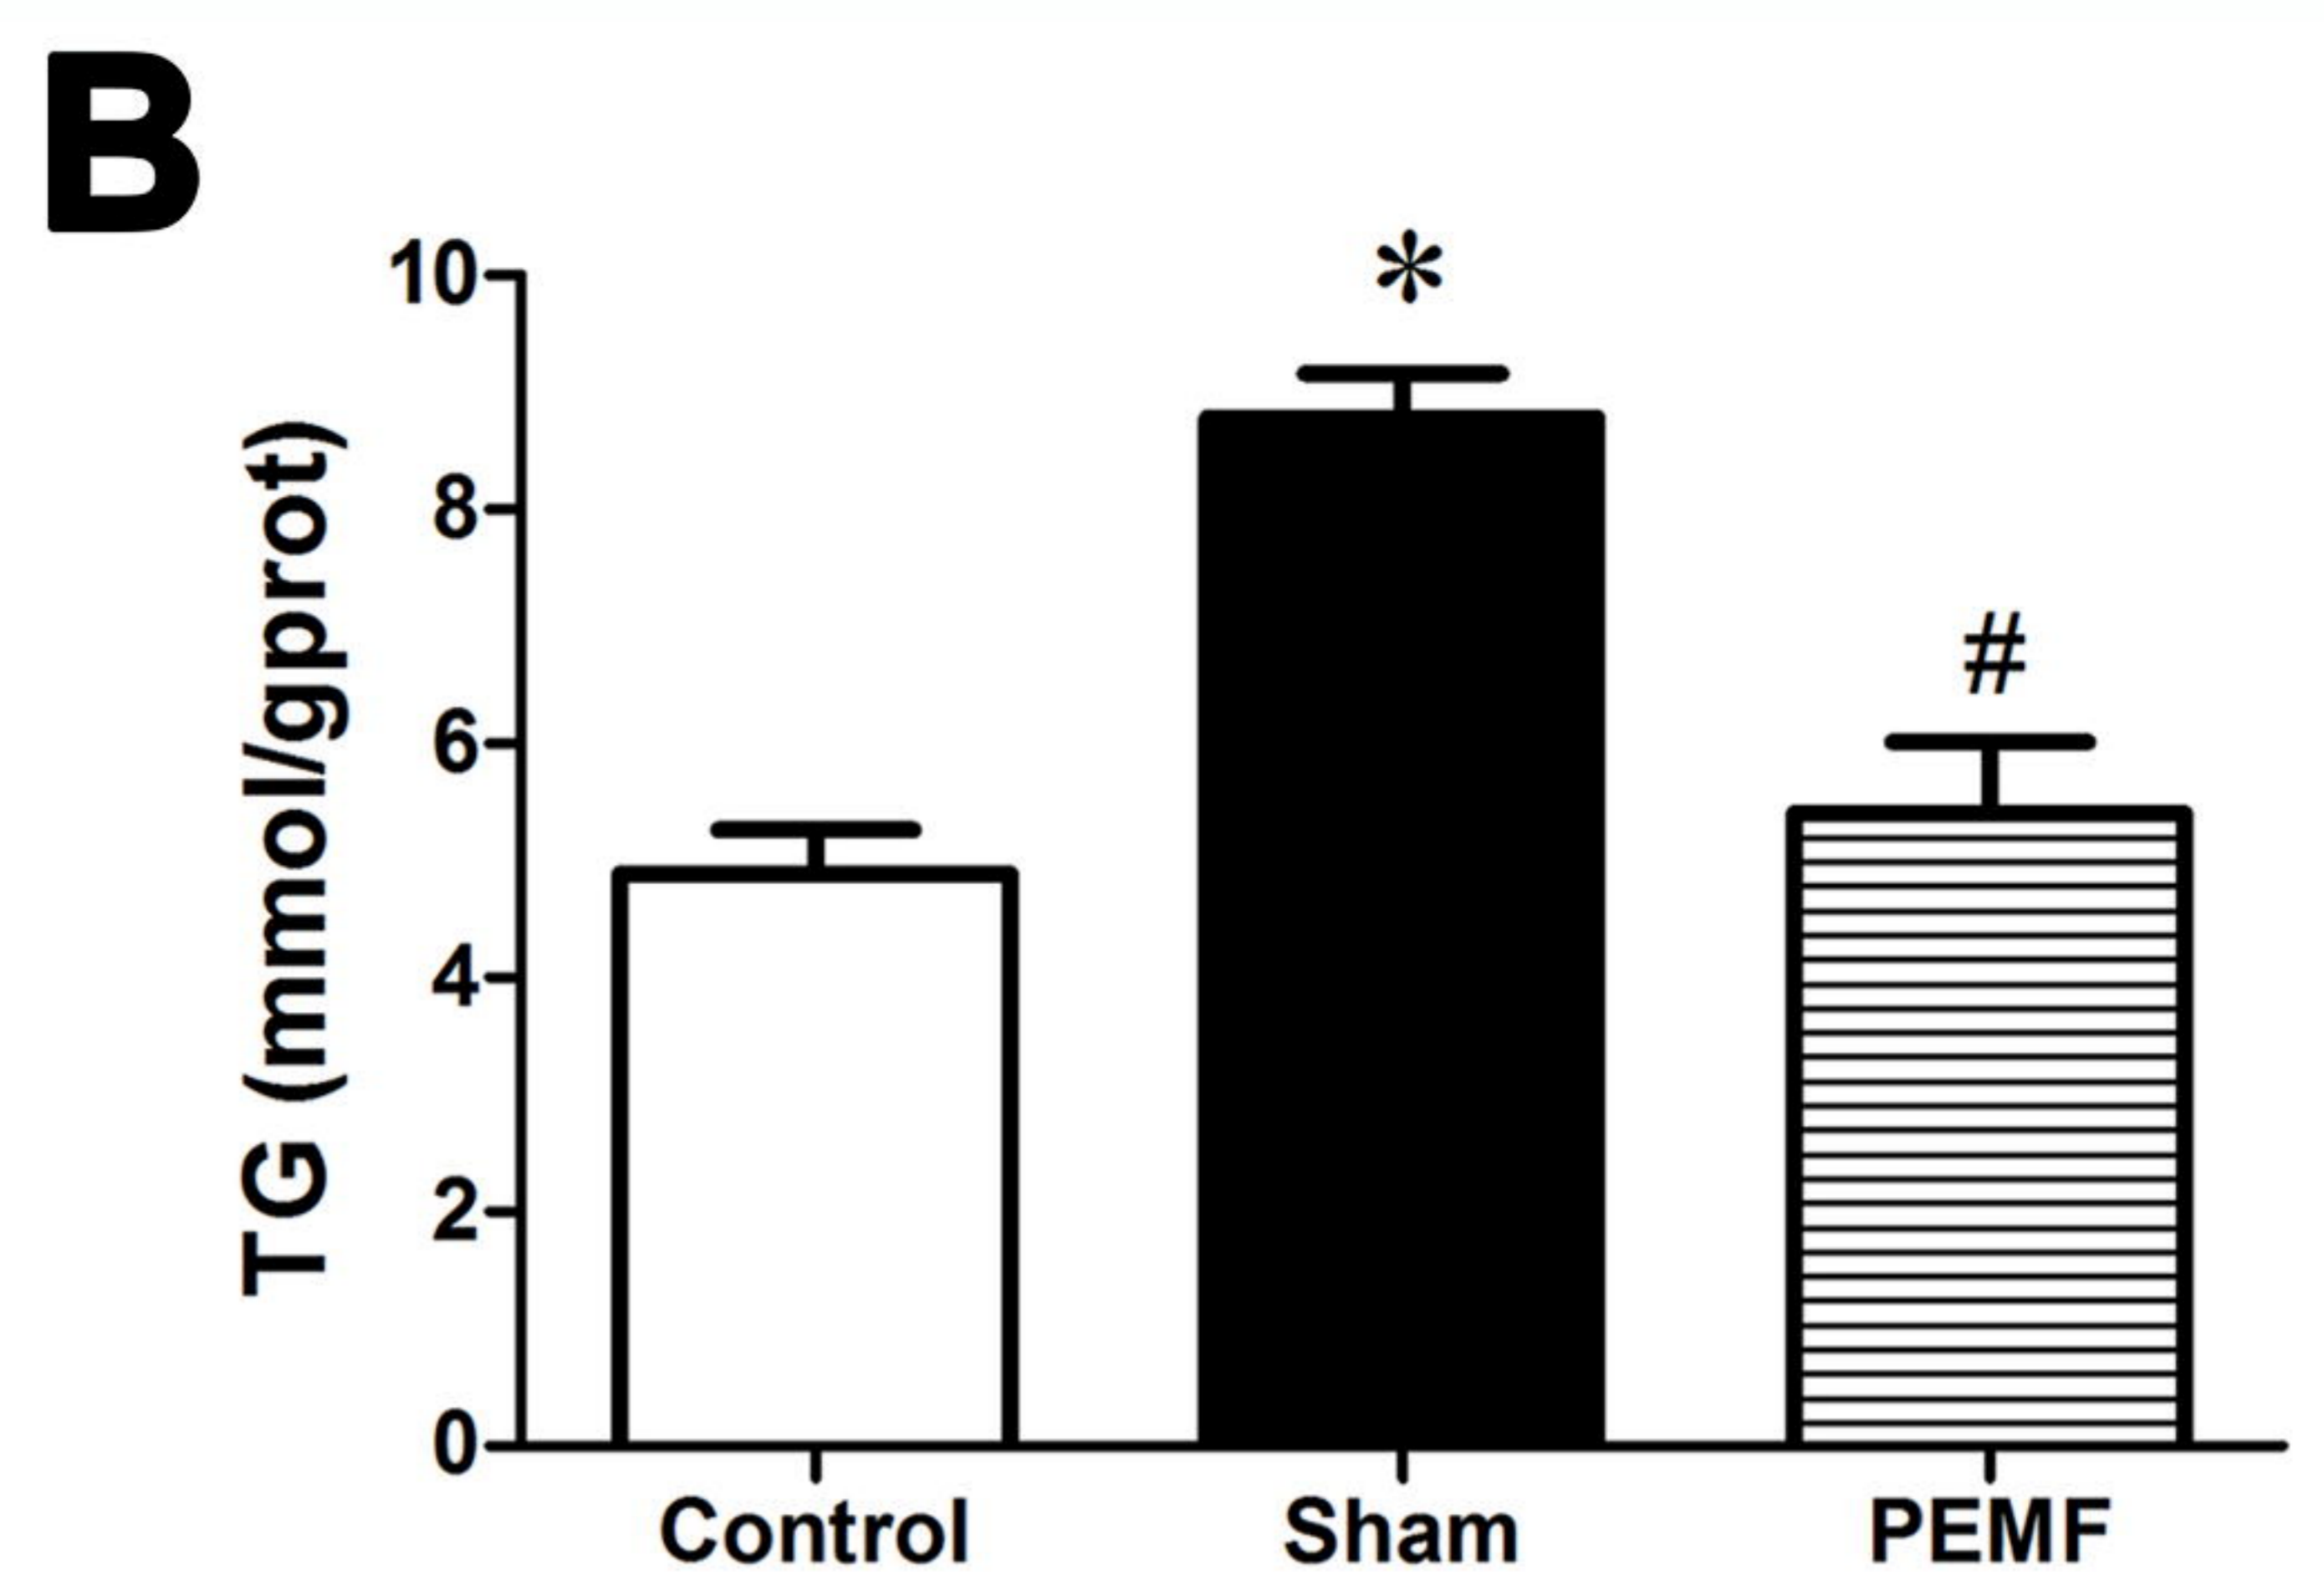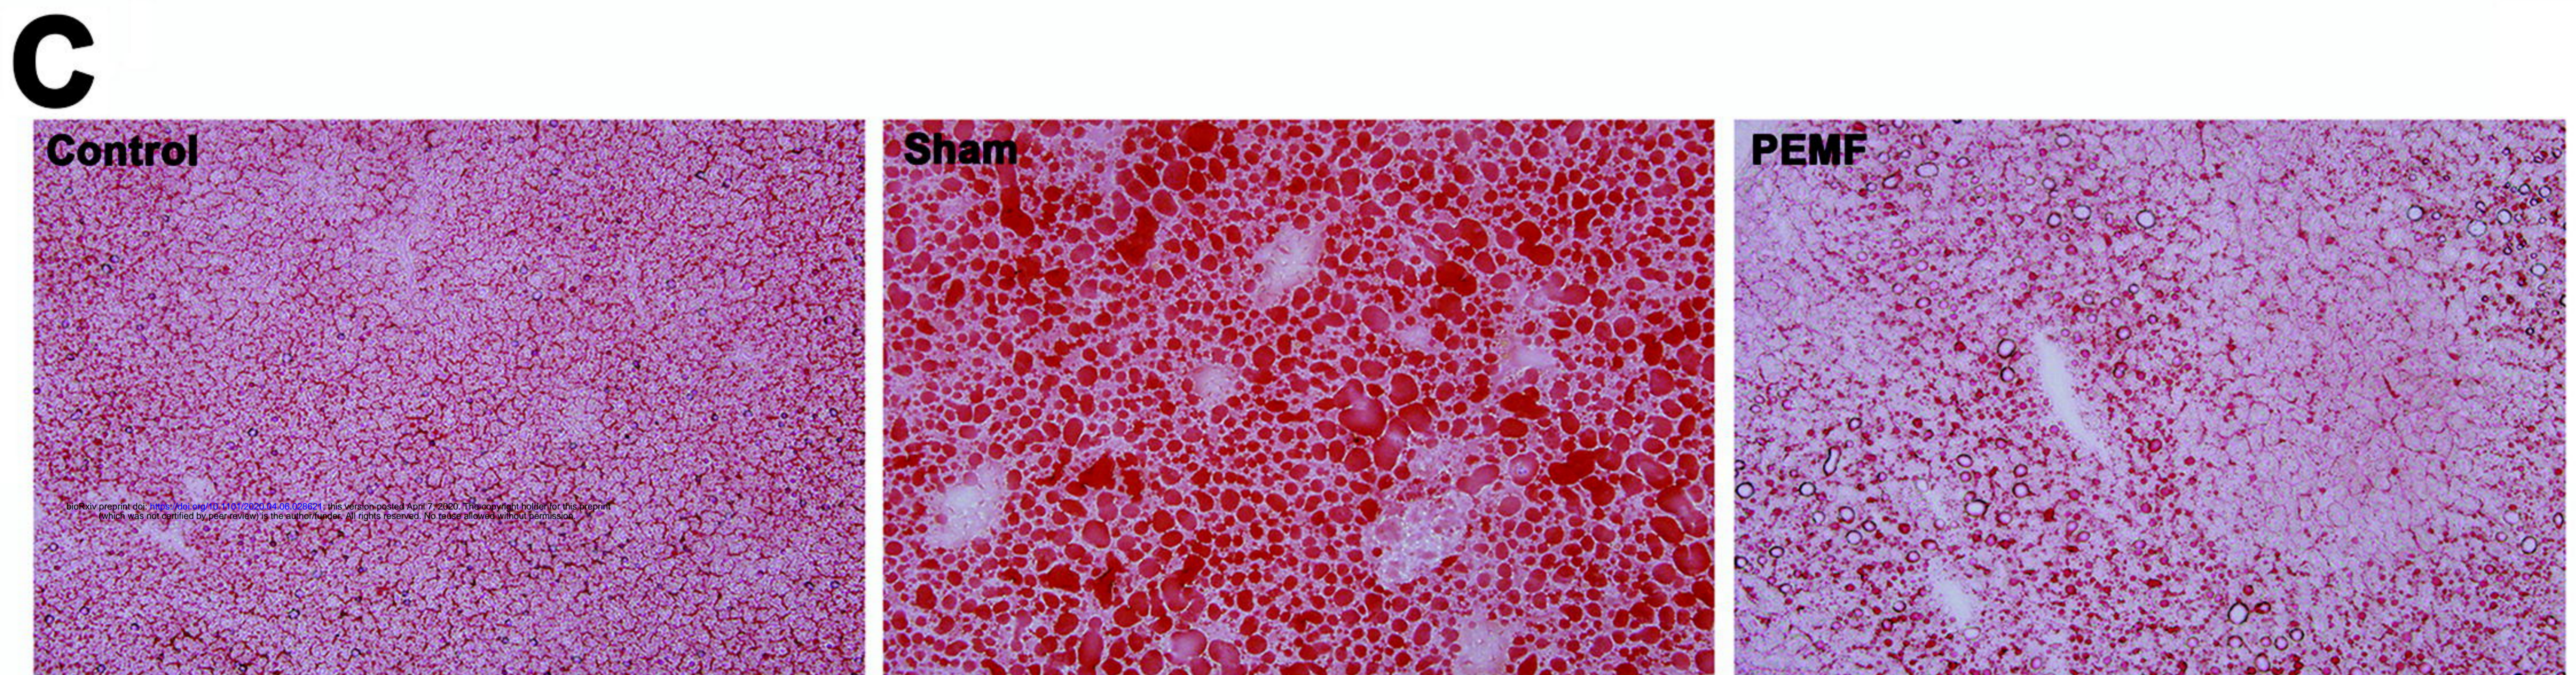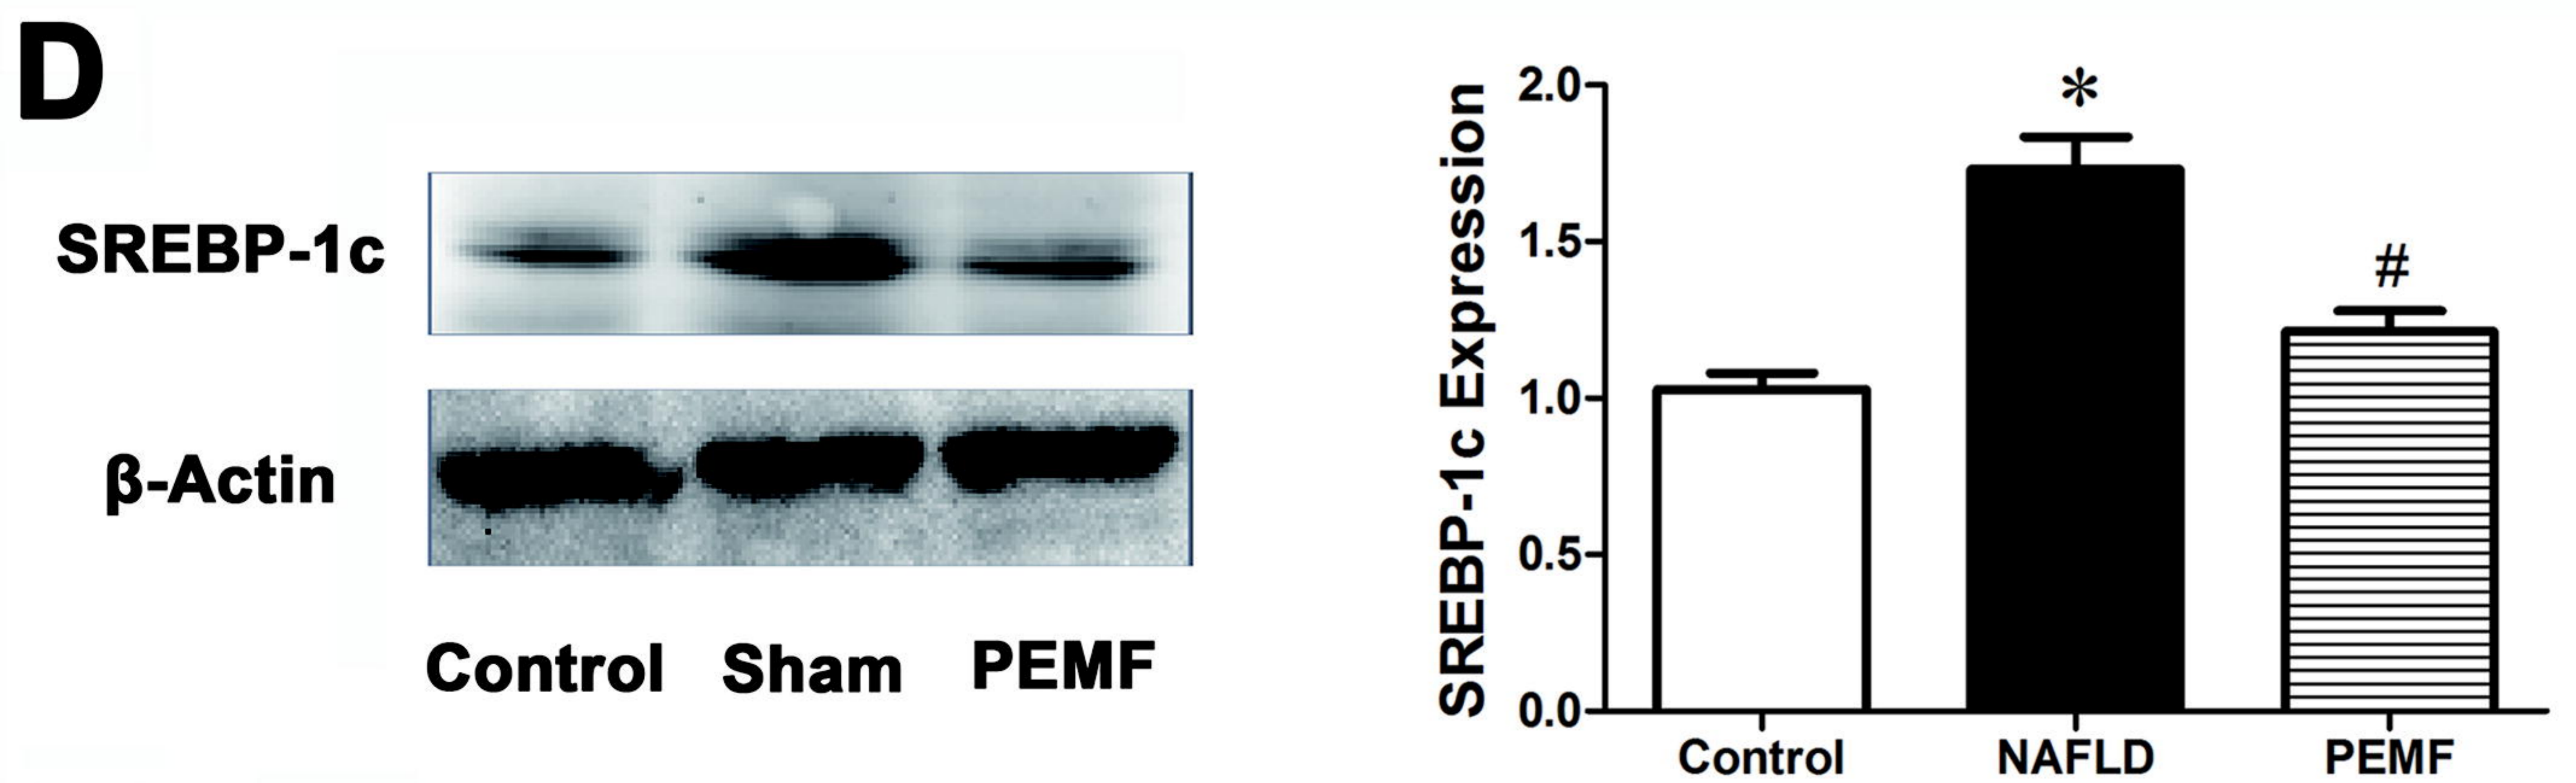

Source: https://www.biorxiv.org/content/10.1101/2020.04.06.028621v1.full.pdf
